# Supplementary material for: CD23 is a glycan-binding receptor in some mammalian species
Source: PubMed Central journal article supplement (PMC6791321; doi:10.1074/jbc.ra119.010572), 2019-09-05
Supplement: supp_RA119.010572_155092_1_supp_387680_px2333.pdf [file supp_RA119.010572_155092_1_supp_387680_px2333.pdf]

Supporting Information

**CD23 is a glycan-binding receptor in some mammalian species**

Sabine A. F. Jégouzo, Hadar Feinberg, Andrew Morrison, Angela Holder, Alisha May, Zhiyao Huang, Linghua Jiang, Yi Lasanajak, David F. Smith, Dirk Werling, Kurt Drickamer, William I. Weis, and Maureen E. Taylor

**Table S1.** Glycan array results for cow CD23 binding to the Consortium for Functional Glycomics array version 5.2.

**Figure S1.** Sequences of C-type lectin-like domains encoded in CD23 genes in mammals.

**Figure S2.** PCR primers for cow CD23 cDNA.

**Figure S3.** PCR primers for mouse CD23 cDNA.

**Figure S4.** Sequence of codon-optimized cDNA for the CRD from cow CD23 without biotin tag.

**Table S1**  
**Cow CD23 binding to array of synthetic glycans from the Consortium for Functional Glycomics**  
 Strepavidin-CRD complex was incubated with the array at a concentration of 100 µg/ml.

| Glycan number | Glycan structure                                                                                                                                                        | Average | Standard deviation |
|---------------|-------------------------------------------------------------------------------------------------------------------------------------------------------------------------|---------|--------------------|
| 470           | GlcNAcβ1-6(GlcNAcβ1-2)Manα1-6(GlcNAcβ1-2Manα1-3)Manβ1-4GlcNAcβ1-4(Fuca1-6)GlcNAcb-Sp24                                                                                  | 4720    | 449                |
| 417           | GlcNAcβ1-2(GlcNAcβ1-6)Manα1-6(GlcNAcβ1-2Manα1-3)Manβ1-4GlcNAcβ1-4GlcNAcb-Sp19                                                                                           | 1818    | 285                |
| 321           | Galβ1-3GlcNAcβ1-2Manα1-6(Galβ1-3GlcNAcβ1-2Manα1-3)Manβ1-4GlcNAcβ1-4GlcNAcb-Sp19                                                                                         | 1743    | 228                |
| 53            | GlcNAcβ1-2Manα1-6(GlcNAcβ1-2Manα1-3)Manβ1-4GlcNAcβ1-4GlcNAcb-Sp13                                                                                                       | 1568    | 103                |
| 468           | Fuca1-2Galβ1-4(Fuca1-3)GlcNAcβ1-2Manα1-6(Fuca1-2Galβ1-4(Fuca1-3)GlcNAcβ1-2Manα1-3)Manβ1-4GlcNAcβ1-4(Fuca1-6)GlcNAcb-Sp24                                                | 1551    | 70                 |
| 351           | Galβ1-3GlcNAcβ1-2Manα1-6(Galβ1-3GlcNAcβ1-2Manα1-3)Manβ1-4GlcNAcβ1-4(Fuca1-6)GlcNAcb-Sp22                                                                                | 1369    | 313                |
| 52            | GlcNAcβ1-2Manα1-6(GlcNAcβ1-2Manα1-3)Manβ1-4GlcNAcβ1-4GlcNAcb-Sp12                                                                                                       | 1329    | 175                |
| 521           | Neu5Aca2-3Galβ1-3GlcNAcβ1-2Manα-Sp0                                                                                                                                     | 1269    | 236                |
| 214           | Manα1-2Manα1-2Manα1-6(Manα1-3)Manα-Sp9                                                                                                                                  | 1247    | 127                |
| 306           | Neu5Aca2-6Galβ1-4GlcNAcβ1-2Manα1-6(GlcNAcβ1-2Manα1-3)Manβ1-4GlcNAcβ1-4GlcNAcb-Sp12                                                                                      | 1148    | 316                |
| 427           | GlcNAcβ1-2Manα1-6(GlcNAcβ1-4)(GlcNAcβ1-2Manα1-3)Manβ1-4GlcNAcβ1-4GlcNAcb-Sp21                                                                                           | 1120    | 457                |
| 596           | Neu5Aca2-6Galβ1-4GlcNAcβ1-3Galβ1-4GlcNAcβ1-3Galβ1-4GlcNAcβ1-2Manα1-6(Neu5Aca2-6Galβ1-4GlcNAcβ1-3Galβ1-4GlcNAcβ1-3Galβ1-4GlcNAcβ1-2Manα1-3)Manβ1-4GlcNAcβ1-4GlcNAcb-Sp12 | 1117    | 93                 |
| 424           | Galβ1-3GlcNAcβ1-6(Galβ1-3GlcNAcβ1-2)Manα1-6(Galβ1-3GlcNAcβ1-2Manα1-3)Manβ1-4GlcNAcβ1-4GlcNAcb-Sp19                                                                      | 1044    | 190                |
| 349           | GlcNAcβ1-2Manα1-6(GlcNAcβ1-2Manα1-3)Manβ1-4GlcNAcβ1-4(Fuca1-6)GlcNAcb-Sp22                                                                                              | 886     | 247                |
| 108           | Galα1-3(Fuca1-2)Galb-Sp18                                                                                                                                               | 864     | 71                 |
| 314           | Manα1-2Manα1-6(Manα1-2Manα1-3)Manα1-6(Manα1-2Manα1-2Manα1-3)Manα-Sp9                                                                                                    | 856     | 51                 |
| 536           | Fuca1-2Galβ1-4GlcNAcβ1-3Galβ1-4GlcNAcβ1-2Manα1-6(Fuca1-2Galβ1-4GlcNAcβ1-3Galβ1-4GlcNAcβ1-2Manα1-3)Manβ1-4GlcNAcβ1-4GlcNAcb-Sp24                                         | 850     | 28                 |
| 358           | Fuca1-2Galβ1-4GlcNAcβ1-2Manα1-6(Fuca1-2Galβ1-4GlcNAcβ1-2Manα1-3)Manβ1-4GlcNAcβ1-4GlcNAcb-Sp20                                                                           | 826     | 111                |
| 215           | Manα1-6(Manα1-3)Manα1-6(Manα1-2Manα1-3)Manβ1-4GlcNAcβ1-4GlcNAcb-Sp12                                                                                                    | 815     | 27                 |
| 522           | Galα1-3Galβ1-3GlcNAcβ1-2Manα-Sp0                                                                                                                                        | 784     | 114                |
| 72            | Fuca1-2Galβ1-4(Fuca1-3)GlcNAcb-Sp8                                                                                                                                      | 783     | 157                |
| 525           | GlcNAcβ1-2 Manα1-6(GlcNAcβ1-4)(GlcNAcβ1-2Manα1-3)Manβ1-4GlcNAcβ1-4(Fuca1-6)GlcNAcb-Sp21                                                                                 | 770     | 209                |
| 518           | GalNAcα1-3(Fuca1-2)Galβ1-4 GlcNAcβ1-2Manα-Sp0                                                                                                                           | 769     | 119                |
| 76            | Fuca1-2Galβ1-4GlcNAcb-Sp8                                                                                                                                               | 743     | 118                |
| 89            | GalNAcα1-3(Fuca1-2)Galb-Sp8                                                                                                                                             | 730     | 53                 |
| 519           | Galβ1-3GlcNAcβ1-2Manα-Sp0                                                                                                                                               | 723     | 46                 |
| 394           | Galβ1-4GlcNAcβ1-2Manα1-6(GlcNAcβ1-2Manα1-3)Manβ1-4GlcNAcβ1-4GlcNAcb-Sp12                                                                                                | 690     | 112                |
| 90            | GalNAcα1-3(Fuca1-2)Galb-Sp18                                                                                                                                            | 662     | 33                 |
| 405           | Galα1-3(Fuca1-2)Galβ1-4(Fuca1-3)Glc-Sp21                                                                                                                                | 646     | 81                 |
| 539           | Galβ1-4GlcNAcβ1-3Galβ1-4GlcNAcβ1-3Galβ1-4GlcNAcβ1-2Manα1-6(Galβ1-4GlcNAcβ1-3Galβ1-4GlcNAcβ1-3Galβ1-4GlcNAcβ1-2Manα1-3)Manβ1-4GlcNAcβ1-4GlcNAcb-Sp12                     | 627     | 120                |
| 202           | GlcAb-Sp8                                                                                                                                                               | 623     | 49                 |
| 313           | Manα1-2Manα1-6(Manα1-3)Manα1-6(Manα1-2Manα1-2Manα1-3)Manα-Sp9                                                                                                           | 608     | 89                 |
| 71            | Fuca1-2Galβ1-4(Fuca1-3)GlcNAcb-Sp0                                                                                                                                      | 595     | 84                 |
| 412           | Fuca1-2Galβ1-4(Fuca1-3)GlcNAcβ1-3GalNAca-Sp14                                                                                                                           | 477     | 26                 |
| 368           | Galα1-3(Fuca1-2)Galβ1-4GlcNAcβ1-2Manα1-6(Galα1-3(Fuca1-2)Galβ1-4GlcNAcβ1-2Manα1-3)Manβ1-4GlcNAcβ1-4GlcNAcb-Sp20                                                         | 472     | 124                |
| 367           | GalNAcα1-3(Fuca1-2)Galβ1-4GlcNAcβ1-2Manα1-6(GalNAcα1-3(Fuca1-2)Galβ1-4GlcNAcβ1-2Manα1-3)Manβ1-4GlcNAcβ1-4GlcNAcb-Sp20                                                   | 468     | 51                 |
| 480           | Galβ1-4GlcNAcβ1-6(Galβ1-4GlcNAcβ1-2)Manα1-6(Galβ1-4GlcNAcβ1-2Manα1-3)Manβ1-4GlcNAcβ1-4(Fuca1-6)GlcNAcb-Sp24                                                             | 465     | 28                 |
| 414           | GalNAcα1-3(Fuca1-2)Galβ1-4(Fuca1-3)GlcNAcβ1-3GalNAc-Sp14                                                                                                                | 456     | 27                 |
| 238           | Neu5Aca2-3Galβ1-3(Fuca1-4)GlcNAcb-Sp8                                                                                                                                   | 419     | 13                 |
| 297           | Neu5Aca2-3Galβ1-4(Fuca1-3)GlcNAcβ1-6(Galβ1-3)GalNAca-Sp14                                                                                                               | 405     | 58                 |
| 393           | GlcNAcβ1-2Manα1-6(Galβ1-4GlcNAcβ1-2Manα1-3)Manβ1-4GlcNAcβ1-4GlcNAcb-Sp12                                                                                                | 405     | 115                |
| 548           | GlcNAcβ1-3Galβ1-4GlcNAcβ1-6(GlcNAcβ1-3Galβ1-4GlcNAcβ1-2)Manα1-6(GlcNAcβ1-3Galβ1-4GlcNAcβ1-2Man α1-3)Manβ1-4GlcNAcβ1-4GlcNAcb-Sp24                                       | 396     | 83                 |
| 104           | Galα1-3(Fuca1-2)Galβ1-4(Fuca1-3)GlcNAcb-Sp8                                                                                                                             | 364     | 48                 |

|     |                                                                                                                                                                                                                         |     |     |
|-----|-------------------------------------------------------------------------------------------------------------------------------------------------------------------------------------------------------------------------|-----|-----|
| 561 | Galβ1-3GlcNAcβ1-3Galβ1-4GlcNAcβ1-3Galβ1-4GlcNAcβ1-6(Galβ1-3GlcNAcβ1-3Galβ1-4GlcNAβ1-2)Manα1-6(Galβ1-3GlcNAcβ1-3Galβ1-4GlcNAcβ1-3Galβ1-4GlcNAcβ1-2Manα1-3)Manβ1-4GlcNAcβ1-4(Fuca1-6)GlcNAcb-Sp24                         | 358 | 101 |
| 208 | Manα1-2Manα1-6(Manα1-2Manα1-3)Mana-Sp9                                                                                                                                                                                  | 356 | 51  |
| 207 | Manα1-2Manα1-2Manα1-3Mana-Sp9                                                                                                                                                                                           | 317 | 166 |
| 359 | Fuca1-2Galβ1-4(Fuca1-3)GlcNAcβ1-2Manα1-6(Fuca1-2Galβ1-4(Fuca1-3)GlcNAcβ1-2Manα1-3)Manβ1-4GlcNAcβ1-4GlcNAcb-Sp20                                                                                                         | 312 | 13  |
| 533 | Galβ1-3GalNAcβ1-3Gal-Sp21                                                                                                                                                                                               | 311 | 46  |
| 362 | Fuca1-4(Galβ1-3)GlcNAcβ1-2Manα1-6(Fuca1-4(Galβ1-3)GlcNAcβ1-2Manα1-3)Manβ1-4GlcNAcβ1-4(Fuca1-6)GlcNAcb-Sp22                                                                                                              | 307 | 37  |
| 28  | (3S)Galβ1-3(Fuca1-4)GlcNAcb-Sp8                                                                                                                                                                                         | 297 | 55  |
| 429 | GlcNAcβ1-6(GlcNAcβ1-2)Manα1-6(GlcNAcβ1-4)(GlcNAcβ1-2Manα1-3)Manβ1-4GlcNAcβ1-4GlcNAc-Sp21                                                                                                                                | 294 | 76  |
| 70  | Fuca1-2Galβ1-4(Fuca1-3)GlcNAcβ1-3Galβ1-4(Fuca1-3)GlcNAcβ1-3Galβ1-4(Fuca1-3)GlcNAcb-Sp0                                                                                                                                  | 291 | 53  |
| 24  | (3S)Galβ1-4(Fuca1-3)(6S)Glc-Sp0                                                                                                                                                                                         | 272 | 18  |
| 572 | Galβ1-4GlcNAcβ1-3Galβ1-4GlcNAcβ1-6(Galβ1-4GlcNAcβ1-3Galβ1-4GlcNAβ1-2)Manα1-6(Galβ1-4GlcNAcβ1-3Galβ1-4GlcNAcβ1-2Manα1-3)Manβ1-4GlcNAcβ1-4(Fuca1-6)GlcNAcb-Sp24                                                           | 258 | 31  |
| 464 | Galα1-3(Fuca1-2)Galβ1-3GalNAcb-Sp8                                                                                                                                                                                      | 241 | 34  |
| 597 | Neu5Aca2-3Galβ1-4GlcNAcβ1-3Galβ1-4GlcNAcβ1-3Galβ1-4GlcNAcβ1-2Manα1-6(Neu5Aca2-3Galβ1-4GlcNAcβ1-3Galβ1-4GlcNAcβ1-3Galβ1-4GlcNAcβ1-2Manα1-3)Manβ1-4GlcNAcβ1-4GlcNAcb-Sp12                                                 | 233 | 42  |
| 248 | Neu5Aca2-3Galβ1-3GlcNAcb-Sp0                                                                                                                                                                                            | 227 | 17  |
| 83  | GalNAca1-3(Fuca1-2)Galβ1-4(Fuca1-3)GlcNAcb-Sp0                                                                                                                                                                          | 226 | 13  |
| 562 | Galβ1-3GlcNAcβ1-3Galβ1-4GlcNAcβ1-6(Galβ1-3GlcNAcβ1-3Galβ1-4GlcNAβ1-2)Manα1-6(Galβ1-3GlcNAcβ1-3Galβ1-4GlcNAcβ1-2Manα1-3)Manβ1-4GlcNAcβ1-4(Fuca1-6)GlcNAcb-Sp24                                                           | 225 | 57  |
| 445 | Fuca1-2Galβ1-4GlcNAcβ1-6(Fuca1-2Galβ1-4GlcNAcβ1-3)GalNAc-Sp14                                                                                                                                                           | 225 | 74  |
| 471 | Galβ1-3GlcNAcβ1-2Manα1-6(GlcNAcβ1-4)(Galβ1-3GlcNAcβ1-2Manα1-3)Manβ1-4GlcNAcβ1-4GlcNAcb-Sp21                                                                                                                             | 216 | 104 |
| 237 | Neu5Aca2-3Galβ1-3(6S)GlcNAc-Sp8                                                                                                                                                                                         | 199 | 52  |
| 350 | Galβ1-4GlcNAcβ1-2Manα1-6(Galβ1-4GlcNAcβ1-2Manα1-3)Manβ1-4GlcNAcβ1-4(Fuca1-6)GlcNAcb-Sp22                                                                                                                                | 193 | 9   |
| 534 | GlcNAcβ1-3Galβ1-4GlcNAcβ1-2Manα1-6(GlcNAcβ1-3Galβ1-4GlcNAcβ1-2Manα1-3)Manβ1-4GlcNAcβ1-4GlcNAcb-Sp12                                                                                                                     | 187 | 41  |
| 420 | GalNAca1-3(Fuca1-2)Galβ1-3GlcNAcβ1-3GalNAc-Sp14                                                                                                                                                                         | 183 | 49  |
| 334 | Neu5Aca2-3Galβ1-4(Fuca1-3)GlcNAcβ1-6(Neu5Aca2-3Galβ1-3)GalNAc-Sp14                                                                                                                                                      | 182 | 30  |
| 374 | Neu5Aca2-3Galβ1-4(Fuca1-3)GlcNAcβ1-3GalNAca-Sp14                                                                                                                                                                        | 180 | 23  |
| 75  | Fuca1-2Galβ1-4GlcNAcb-Sp0                                                                                                                                                                                               | 179 | 55  |
| 88  | GlcNAcβ1-3Galβ1-3GalNAca-Sp8                                                                                                                                                                                            | 179 | 16  |
| 442 | Fuca1-2Galβ1-4(Fuca1-3)GlcNAcβ1-2Manα1-6(Fuca1-2Galβ1-4(Fuca1-3)GlcNAcβ1-4(Fuca1-2Galβ1-4(Fuca1-3)GlcNAcβ1-2)Manα1-3)Manβ1-4GlcNAcβ1-4GlcNAcb-Sp12                                                                      | 178 | 37  |
| 289 | Galβ1-4(Fuca1-3)(6S)Glc-Sp0                                                                                                                                                                                             | 169 | 25  |
| 450 | GalNAca1-3(Fuca1-2)Galβ1-4GlcNAcβ1-2Manα1-6(GalNAca1-3(Fuca1-2)Galβ1-4GlcNAcβ1-2Manα1-3)Manβ1-4GlcNAcβ1-4(Fuca1-6)GlcNAcb-Sp22                                                                                          | 168 | 56  |
| 103 | Galα1-3(Fuca1-2)Galβ1-4(Fuca1-3)GlcNAcb-Sp0                                                                                                                                                                             | 166 | 32  |
| 566 | GlcNAcβ1-3Galβ1-4GlcNAcβ1-3Galβ1-4GlcNAcβ1-2Manα1-6(GlcNAcβ1-3Galβ1-4GlcNAcβ1-3Galβ1-4GlcNAcβ1-2Manα1-3)Manβ1-4GlcNAcβ1-4(Fuca1-6)GlcNAcb-Sp24                                                                          | 165 | 68  |
| 97  | GalNAcβ1-4(Fuca1-3)GlcNAcb-Sp0                                                                                                                                                                                          | 164 | 18  |
| 356 | KDNa2-3Galβ1-3GalNAca-Sp14                                                                                                                                                                                              | 162 | 55  |
| 255 | Neu5Aca2-3Galβ1-4(Fuca1-3)GlcNAcβ1-3Galβ1-4GlcNAcb-Sp8                                                                                                                                                                  | 161 | 24  |
| 397 | Galβ1-4(Fuca1-3)GlcNAcβ1-3GalNAca-Sp14                                                                                                                                                                                  | 159 | 53  |
| 119 | Galα1-4(Fuca1-2)Galβ1-4GlcNAcb-Sp8                                                                                                                                                                                      | 151 | 18  |
| 466 | Glcα1-4Glcα1-4Glcα1-4Glcβ-Sp10                                                                                                                                                                                          | 150 | 22  |
| 179 | GlcNAcβ1-3GalNAca-Sp8                                                                                                                                                                                                   | 150 | 13  |
| 278 | Neu5Gca2-3Galβ1-3(Fuca1-4)GlcNAcb-Sp0                                                                                                                                                                                   | 147 | 24  |
| 415 | Galβ1-4(Fuca1-3)GlcNAcβ1-2Manα1-6(Galβ1-4(Fuca1-3)GlcNAcβ1-2Manα1-3)Manβ1-4GlcNAcβ1-4(Fuca1-6)GlcNAcb-Sp22                                                                                                              | 146 | 26  |
| 413 | Galα1-3(Fuca1-2)Galβ1-4(Fuca1-3)GlcNAcβ1-3GalNAc-Sp14                                                                                                                                                                   | 144 | 95  |
| 537 | GlcNAcβ1-3Galβ1-4GlcNAcβ1-3Galβ1-4GlcNAcβ1-2Manα1-6(GlcNAcβ1-3Galβ1-4GlcNAcβ1-3Galβ1-4GlcNAcβ1-2Manα1-3)Manβ1-4GlcNAcβ1-4GlcNAcb-Sp12                                                                                   | 142 | 10  |
| 423 | Galα1-3(Fuca1-2)Galβ1-4GlcNAcβ1-2Manα1-6(Galα1-3(Fuca1-2)Galβ1-4GlcNAcβ1-2Manα1-3)Manβ1-4GlcNAcβ1-4(Fuca1-6)GlcNAcb-Sp22                                                                                                | 142 | 42  |
| 598 | Neu5Aca2-6Galβ1-4GlcNAcβ1-3Galβ1-4GlcNAcβ1-2Manα1-6(Neu5Aca2-6Galβ1-4GlcNAcβ1-3Galβ1-4GlcNAcβ1-2Manα1-3)Manβ1-4GlcNAcβ1-4GlcNAcb-Sp12                                                                                   | 142 | 23  |
| 555 | Galβ1-4GlcNAcβ1-3Galβ1-4GlcNAcβ1-3Galβ1-4GlcNAcβ1-3Galβ1-4GlcNAcβ1-3Galβ1-4GlcNAcβ1-2Manα1-6(Galβ1-4GlcNAcβ1-3Galβ1-4GlcNAcβ1-3Galβ1-4GlcNAcβ1-3Galβ1-4GlcNAcβ1-3Galβ1-4GlcNAcβ1-2Manα1-3)Manβ1-4GlcNAcβ1-4GlcNAcb-Sp25 | 142 | 30  |
| 251 | Neu5Aca2-3Galβ1-4(Fuca1-3)GlcNAcβ1-3Galβ1-4(Fuca1-3)GlcNAcβ1-3Galβ1-4(Fuca1-3)GlcNAcb-Sp0                                                                                                                               | 141 | 23  |
| 290 | Galβ1-4(Fuca1-3)GlcNAcβ1-3Galβ1-3(Fuca1-4)GlcNAcb-Sp0                                                                                                                                                                   | 140 | 19  |

|     |                                                                                                                                                                                                           |     |    |
|-----|-----------------------------------------------------------------------------------------------------------------------------------------------------------------------------------------------------------|-----|----|
| 357 | Fuca1-2Galβ1-3GlcNAcβ1-2Mana1-6(Fuca1-2Galβ1-3GlcNAcβ1-2Mana1-3)Manβ1-4GlcNAcβ1-4GlcNAcb-Sp20                                                                                                             | 140 | 10 |
| 400 | Galα1-4Galβ1-4GlcNAcβ1-2Mana1-6(Galα1-4Galβ1-4GlcNAcβ1-2Mana1-3)Manβ1-4GlcNAcβ1-4GlcNAcb-Sp24                                                                                                             | 138 | 47 |
| 416 | Fuca1-2Galβ1-4GlcNAcβ1-2Mana1-6(Fuca1-2Galβ1-4GlcNAcβ1-2Mana1-3)Manβ1-4GlcNAcβ1-4(Fuca1-6)GlcNAcb-Sp22                                                                                                    | 138 | 3  |
| 132 | Galβ1-4GlcNAcβ1-6GalNAc-Sp14                                                                                                                                                                              | 137 | 31 |
| 487 | (3S)Galβ1-3(Fuca1-4)GlcNAcb-Sp0                                                                                                                                                                           | 137 | 54 |
| 443 | Galβ1-4(Fuca1-3)GlcNAcβ1-6GalNAc-Sp14                                                                                                                                                                     | 133 | 8  |
| 192 | GlcNAcβ1-6GalNAca-Sp8                                                                                                                                                                                     | 132 | 17 |
| 465 | Glcα1-6Glcα1-6Glcα1-6Glcβ-Sp10                                                                                                                                                                            | 131 | 28 |
| 477 | Neu5Aca2-6Galβ1-4GlcNAcβ1-2Mana1-6(Neu5Aca2-6Galβ1-4GlcNAcβ1-2Mana1-3)Manβ1-4GlcNAcβ1-4(Fuca1-6)GlcNAcb-Sp24                                                                                              | 131 | 25 |
| 247 | Fuca1-2(6S)Galβ1-4Glcβ-Sp0                                                                                                                                                                                | 131 | 22 |
| 528 | Fuca1-4(Galβ1-3)GlcNAcβ1-2 Mana-Sp0                                                                                                                                                                       | 131 | 31 |
| 496 | Fuca1-2(6S)Galβ1-3(6S)GlcNAcb-Sp0                                                                                                                                                                         | 129 | 41 |
| 260 | Fuca1-2Galβ1-4(6S)Glcβ-Sp0                                                                                                                                                                                | 128 | 39 |
| 288 | Galβ1-4(Fuca1-3)(6S)GlcNAcb-Sp0                                                                                                                                                                           | 127 | 8  |
| 448 | Neu5Aca2-8Neu5Aca2-3Galβ1-3GalNAcβ1-4(Neu5Aca2-8Neu5Aca2-3)Galβ1-4Glcβ-Sp0                                                                                                                                | 125 | 32 |
| 219 | (3S)Galβ1-4(Fuca1-3)(6S)GlcNAcb-Sp8                                                                                                                                                                       | 124 | 19 |
| 451 | Galα1-3(Fuca1-2)Galβ1-3GlcNAcβ1-2Mana1-6(Galα1-3(Fuca1-2)Galβ1-3GlcNAcβ1-2Mana1-3)Manβ1-4GlcNAcβ1-4(Fuca1-6)GlcNAcb-Sp22                                                                                  | 120 | 18 |
| 193 | GlcNAcβ1-6GalNAca-Sp14                                                                                                                                                                                    | 118 | 22 |
| 390 | Galα1-3Galβ1-3GlcNAcβ1-2Mana1-6(Galα1-3Galβ1-3GlcNAcβ1-2Mana1-3)Manβ1-4GlcNAcβ1-4GlcNAc-Sp19                                                                                                              | 118 | 51 |
| 80  | Fuca1-4GlcNAcb-Sp8                                                                                                                                                                                        | 118 | 35 |
| 593 | Neu5Aca2-3Galβ1-4GlcNAcβ1-3Galβ1-4GlcNAcβ1-2Mana1-6(Neu5Aca2-3Galβ1-4GlcNAcβ1-3Galβ1-4GlcNAcβ1-2Mana1-3)Manβ1-4GlcNAcβ1-4GlcNAcb-Sp12                                                                     | 116 | 26 |
| 312 | Mana1-6(Mana1-3)Mana1-6(Mana1-3)Manb-Sp10                                                                                                                                                                 | 115 | 10 |
| 245 | Neu5Aca2-3Galβ1-3GalNAcβ1-3Galα1-4Galβ1-4Glcβ-Sp0                                                                                                                                                         | 114 | 34 |
| 328 | Neu5Aca2-3Galβ1-3(Fuca1-4)GlcNAcβ1-3Galβ1-3(Fuca1-4)GlcNAcb-Sp0                                                                                                                                           | 113 | 15 |
| 216 | Mana1-6(Mana1-3)Mana1-6(Mana1-3)Manβ1-4GlcNAcβ1-4GlcNAcb-Sp12                                                                                                                                             | 112 | 9  |
| 126 | Galβ1-3(Fuca1-4)GlcNAcβ1-3Galβ1-4(Fuca1-3)GlcNAcb-Sp0                                                                                                                                                     | 112 | 14 |
| 127 | Galβ1-3GlcNAcβ1-3Galβ1-4(Fuca1-3)GlcNAcb-Sp0                                                                                                                                                              | 112 | 21 |
| 355 | KDNα2-3Galβ1-4Glc-Sp0                                                                                                                                                                                     | 112 | 19 |
| 369 | Galα1-3Galβ1-4(Fuca1-3)GlcNAcβ1-2Mana1-6(Galα1-3Galβ1-4(Fuca1-3)GlcNAcβ1-2Mana1-3)Manβ1-4GlcNAcβ1-4GlcNAcb-Sp20                                                                                           | 111 | 5  |
| 403 | Galβ1-3GlcNAcα1-6Galβ1-4GlcNAcb-Sp0                                                                                                                                                                       | 111 | 52 |
| 168 | Galβ1-4GlcNAcb-Sp0                                                                                                                                                                                        | 111 | 24 |
| 489 | Fuca1-2Galβ1-4GlcNAcβ1-6GalNAca-Sp14                                                                                                                                                                      | 109 | 21 |
| 145 | Galβ1-3GalNAcβ1-4Galβ1-4Glcβ-Sp8                                                                                                                                                                          | 109 | 13 |
| 261 | Neu5Aca2-3Galβ1-4Glcβ-Sp0                                                                                                                                                                                 | 109 | 17 |
| 391 | Galα1-3Galβ1-3(Fuca1-4)GlcNAcβ1-2Mana1-6(Galα1-3Galβ1-3(Fuca1-4)GlcNAcβ1-2Mana1-3)Manβ1-4GlcNAcβ1-4GlcNAc-Sp19                                                                                            | 108 | 16 |
| 388 | GalNAcβ1-4(Neu5Aca2-3)Galβ1-4GlcNAcβ1-3GalNAca-Sp14                                                                                                                                                       | 108 | 20 |
| 346 | Galβ1-4GlcNAcβ1-2Mana1-3Manβ1-4GlcNAcβ1-4GlcNAc-Sp12                                                                                                                                                      | 107 | 3  |
| 535 | GlcNAcβ1-3Galβ1-4GlcNAcβ1-2Mana1-6(GlcNAcβ1-3Galβ1-4GlcNAcβ1-2Mana1-3)Manβ1-4GlcNAcβ1-4GlcNAcb-Sp25                                                                                                       | 107 | 17 |
| 352 | (6S)GlcNAcβ1-3Galβ1-4GlcNAcb-Sp0                                                                                                                                                                          | 105 | 24 |
| 195 | Glcα1-4Glcβ-Sp8                                                                                                                                                                                           | 105 | 22 |
| 375 | GalNAcβ1-4GlcNAcβ1-2Mana1-6(GalNAcβ1-4GlcNAcβ1-2Mana1-3)Manβ1-4GlcNAcβ1-4GlcNAc-Sp12                                                                                                                      | 105 | 20 |
| 79  | Fuca1-3GlcNAcb-Sp8                                                                                                                                                                                        | 104 | 17 |
| 111 | Galα1-3GalNAca-Sp16                                                                                                                                                                                       | 103 | 6  |
| 371 | Fuca1-4(Fuca1-2Galβ1-3)GlcNAcβ1-2Mana1-3(Fuca1-4(Fuca1-2Galβ1-3)GlcNAcβ1-2Mana1-3)Manβ1-4GlcNAcβ1-4GlcNAcb-Sp19                                                                                           | 103 | 28 |
| 453 | GalNAca1-3(Fuca1-2)Galβ1-3GlcNAcβ1-2Mana1-6(GalNAca1-3(Fuca1-2)Galβ1-3GlcNAcβ1-2Mana1-3)Manβ1-4GlcNAcβ1-4(Fuca1-6)GlcNAcb-Sp22                                                                            | 103 | 8  |
| 32  | (3S)Galβ1-4(Fuca1-3)GlcNAc-Sp0                                                                                                                                                                            | 103 | 7  |
| 446 | Galα1-3(Fuca1-2)Galβ1-4GlcNAcβ1-6(Galα1-3(Fuca1-2)Galβ1-4GlcNAcβ1-3)GalNAc-Sp14                                                                                                                           | 103 | 31 |
| 554 | GlcNAcβ1-3Galβ1-4GlcNAcβ1-3Galβ1-4GlcNAcβ1-3Galβ1-4GlcNAcβ1-2Mana1-6(GlcNAcβ1-3Galβ1-4GlcNAcβ1-3Galβ1-4GlcNAcβ1-3Galβ1-4GlcNAcβ1-3Galβ1-4GlcNAcβ1-3Galβ1-4GlcNAcβ1-2Mana1-3)Manβ1-4GlcNAcβ1-4GlcNAcb-Sp25 | 102 | 32 |
| 568 | GlcNAcβ1-3Galβ1-4GlcNAcβ1-3Galβ1-4GlcNAcβ1-3Galβ1-4GlcNAcβ1-2Mana1-6(GlcNAcβ1-3Galβ1-4GlcNAcβ1-3Galβ1-4GlcNAcβ1-3Galβ1-4GlcNAcβ1-2Mana1-3)Manβ1-4GlcNAcβ1-4(Fuca1-6)GlcNAcb-Sp24                          | 102 | 50 |
| 353 | KDNα2-3Galβ1-4(Fuca1-3)GlcNAc-Sp0                                                                                                                                                                         | 102 | 12 |

|     |                                                                                                                                                      |     |    |
|-----|------------------------------------------------------------------------------------------------------------------------------------------------------|-----|----|
| 84  | (3S)Galβ1-4(Fuca1-3)Glc-Sp0                                                                                                                          | 101 | 19 |
| 272 | Neu5Acα2-6Galb-Sp8                                                                                                                                   | 100 | 16 |
| 120 | Galα1-4Galβ1-4GlcNAcb-Sp0                                                                                                                            | 99  | 11 |
| 320 | Neu5Gcb2-6Galβ1-4GlcNAc-Sp8                                                                                                                          | 99  | 7  |
| 165 | Galβ1-4GlcNAcβ1-3Galβ1-4Glc-Sp8                                                                                                                      | 98  | 34 |
| 268 | Neu5Acα2-6Galβ1-4GlcNAcβ1-3Galβ1-4(Fuca1-3)GlcNAcβ1-3Galβ1-4(Fuca1-3)GlcNAcb-Sp0                                                                     | 97  | 8  |
| 161 | Galβ1-4GlcNAcβ1-3Galβ1-4(Fuca1-3)GlcNAcβ1-3Galβ1-4(Fuca1-3)GlcNAcb-Sp0                                                                               | 96  | 14 |
| 581 | Galβ1-4GlcNAcβ1-3Galβ1-4GlcNAcβ1-6(Galβ1-4GlcNAcβ1-3Galβ1-4GlcNAcβ1-3)GalNAca-Sp14                                                                   | 95  | 5  |
| 318 | Neu5Acα2-8Neu5Ac-Sp17                                                                                                                                | 95  | 9  |
| 218 | Neu5Acα2-3Galβ1-4GlcNAcβ1-3Galβ1-4(Fuca1-3)GlcNAcb-Sp0                                                                                               | 95  | 12 |
| 330 | Galα1-4Galβ1-4GlcNAcβ1-3Galβ1-4Glc-Sp0                                                                                                               | 94  | 25 |
| 454 | Galβ1-4GlcNAcβ1-6(Galβ1-4GlcNAcβ1-2)Mana1-6(Galβ1-4GlcNAcβ1-2Mana1-3)Manβ1-4GlcNAcβ1-4GlcNAcb-Sp19                                                   | 94  | 7  |
| 54  | Galβ1-4GlcNAcβ1-2Mana1-6(Galβ1-4GlcNAcβ1-2Mana1-3)Manβ1-4GlcNAcβ1-4GlcNAcb-Sp12                                                                      | 94  | 15 |
| 469 | Fuca1-2Galβ1-3(Fuca1-4)GlcNAcβ1-2Mana1-6(Fuca1-2Galβ1-3(Fuca1-4)GlcNAcβ1-2Mana1-3)Manβ1-4GlcNAcβ1-4(Fuca1-6)GlcNAcβ1-4(Fuca1-6)GlcNAcb-Sp19          | 94  | 18 |
| 167 | Galβ1-4GlcNAcβ1-6(Galβ1-3)GalNAc-Sp14                                                                                                                | 93  | 9  |
| 236 | Neu5Acα2-3GalNAcβ1-4GlcNAcb-Sp0                                                                                                                      | 93  | 38 |
| 550 | Galα1-3Galβ1-4GlcNAcβ1-2Mana1-6(Galα1-3Galβ1-4GlcNAcβ1-2Mana1-3)Manβ1-4GlcNAcβ1-4GlcNAc-Sp24                                                         | 93  | 16 |
| 549 | Galβ1-4GlcNAcβ1-3Galβ1-4GlcNAcβ1-6(Galβ1-4GlcNAcβ1-3Galβ1-4GlcNAcβ1-2)Mana1-6(Galβ1-4GlcNAcβ1-3Galβ1-4GlcNAcβ1-2Mana1-3)Mana1-4GlcNAcβ1-4GlcNAc-Sp24 | 92  | 32 |
| 143 | Galβ1-3GalNAcβ1-3Galα1-4Galβ1-4Glc-Sp0                                                                                                               | 92  | 6  |
| 240 | Neu5Acα2-3Galβ1-4(Neu5Acα2-3Galβ1-3)GlcNAcb-Sp8                                                                                                      | 92  | 20 |
| 370 | GalNAcα1-3(Fuca1-2)Galβ1-3GlcNAcβ1-2Mana1-6(GalNAcα1-3(Fuca1-2)Galβ1-3GlcNAcβ1-2Mana1-3)Manβ1-4GlcNAcβ1-4GlcNAcb-Sp20                                | 92  | 25 |
| 360 | Galα1-3Galβ1-4GlcNAcβ1-2Mana1-6(Galα1-3Galβ1-4GlcNAcβ1-2Mana1-3)Manβ1-4GlcNAcβ1-4GlcNAcb-Sp20                                                        | 91  | 12 |
| 384 | GlcNAcβ1-2Mana1-6(GlcNAcβ1-4(GlcNAcβ1-2)Mana1-3)Manβ1-4GlcNAcβ1-4GlcNAc-Sp21                                                                         | 91  | 14 |
| 380 | Galβ1-4GlcNAcβ1-6(Fuca1-4(Fuca1-2Galβ1-3)GlcNAcβ1-3)Galβ1-4Glc-Sp21                                                                                  | 91  | 17 |
| 93  | GalNAcα1-4(Fuca1-2)Galβ1-4GlcNAcb-Sp8                                                                                                                | 91  | 9  |
| 166 | Galβ1-4GlcNAcβ1-6(Galβ1-3)GalNAca-Sp8                                                                                                                | 90  | 15 |
| 441 | Fuca1-2Galβ1-4GlcNAcβ1-2Mana1-6(Fuca1-2Galβ1-4GlcNAcβ1-2(Fuca1-2Galβ1-4GlcNAcβ1-4)Mana1-3)Manβ1-4GlcNAcβ1-4GlcNAcb-Sp12                              | 90  | 14 |
| 96  | GalNAcβ1-3Galα1-4Galβ1-4GlcNAcb-Sp0                                                                                                                  | 90  | 10 |
| 204 | GlcAβ1-6Galb-Sp8                                                                                                                                     | 90  | 19 |
| 339 | GlcNAcα1-4Galβ1-4GlcNAcβ1-3Galβ1-4(Fuca1-3)GlcNAcβ1-3Galβ1-4(Fuca1-3)GlcNAcb-Sp0                                                                     | 89  | 8  |
| 213 | Mana1-6(Mana1-3)Mana-Sp9                                                                                                                             | 89  | 6  |
| 78  | Fuca1-2Galb-Sp8                                                                                                                                      | 89  | 19 |
| 100 | Galα1-2Galb-Sp8                                                                                                                                      | 88  | 34 |
| 107 | Galα1-3(Fuca1-2)Galb-Sp8                                                                                                                             | 88  | 17 |
| 222 | Fuca1-2(6S)Galβ1-4(6S)Glc-Sp0                                                                                                                        | 88  | 2  |
| 300 | Galβ1-4GlcNAcβ1-6(Galβ1-4GlcNAcβ1-3)Galβ1-4GlcNAc-Sp0                                                                                                | 88  | 21 |
| 256 | Neu5Acα2-3Galβ1-4GlcNAcβ1-3Galβ1-4GlcNAcβ1-3Galβ1-4GlcNAcb-Sp0                                                                                       | 88  | 11 |
| 449 | GalNAcβ1-4Galβ1-4Glc-Sp0                                                                                                                             | 88  | 28 |
| 131 | Galβ1-4GlcNAcβ1-6GalNAca-Sp8                                                                                                                         | 87  | 20 |
| 541 | Galβ1-3GlcNAcβ1-3Galβ1-4GlcNAcβ1-2Mana1-6(Galβ1-3GlcNAcβ1-3Galβ1-4GlcNAcβ1-2Mana1-3)Manβ1-4GlcNAcβ1-4GlcNAc-Sp25                                     | 87  | 10 |
| 283 | Neu5Gca2-6GalNAca-Sp0                                                                                                                                | 87  | 21 |
| 478 | Neu5Acα2-3Galβ1-4GlcNAcβ1-2Mana1-6(Neu5Acα2-3Galβ1-4GlcNAcβ1-2Mana1-3)Manβ1-4GlcNAcβ1-4(Fuca1-6)GlcNAcb-Sp24                                         | 87  | 20 |
| 354 | KDNα2-6Galβ1-4GlcNAc-Sp0                                                                                                                             | 87  | 38 |
| 467 | Neu5Acα2-3Galβ1-4GlcNAcβ1-6(Neu5Acα2-3Galβ1-4GlcNAcβ1-3)GalNAca-Sp14                                                                                 | 86  | 18 |
| 82  | GalNAcα1-3(Fuca1-2)Galβ1-3GlcNAcb-Sp0                                                                                                                | 86  | 39 |
| 189 | GlcNAcβ1-4GlcNAcβ1-4GlcNAcβ1-4GlcNAcβ1-4GlcNAcβ1-4GlcNAcβ1-4GlcNAcβ1-Sp8                                                                             | 86  | 6  |
| 150 | Galβ1-3GlcNAcb-Sp8                                                                                                                                   | 85  | 20 |
| 102 | Galα1-3(Fuca1-2)Galβ1-3GlcNAcb-Sp8                                                                                                                   | 85  | 22 |
| 162 | Galβ1-4GlcNAcβ1-3Galβ1-4GlcNAcβ1-3Galβ1-4GlcNAcb-Sp0                                                                                                 | 85  | 12 |
| 128 | Galβ1-3(Fuca1-4)GlcNAc-Sp0                                                                                                                           | 84  | 13 |
| 239 | Neu5Acα2-3Galβ1-3(Fuca1-4)GlcNAcβ1-3Galβ1-4(Fuca1-3)GlcNAcb-Sp0                                                                                      | 84  | 23 |

|     |                                                                                                                                                                                                                                  |    |    |
|-----|----------------------------------------------------------------------------------------------------------------------------------------------------------------------------------------------------------------------------------|----|----|
| 571 | Galβ1-4GlcNAcβ1-3Galβ1-4GlcNAcβ1-3Galβ1-4GlcNAcβ1-3Galβ1-4GlcNAcβ1-3Galβ1-4GlcNAcβ1-2Manα1-6(Galβ1-4GlcNAcβ1-3Galβ1-4GlcNAcβ1-3Galβ1-4GlcNAcβ1-3Galβ1-4GlcNAcβ1-3Galβ1-4GlcNAcβ1-2Manα1-3)Manβ1-4GlcNAcβ1-4(Fuca1-6)GlcNAcb-Sp19 | 84 | 52 |
| 510 | (3S)GalNAcβ1-4GlcNAc-Sp8                                                                                                                                                                                                         | 84 | 7  |
| 512 | Galβ1-4(6P)GlcNAcb-Sp0                                                                                                                                                                                                           | 84 | 17 |
| 121 | Galα1-4Galβ1-4GlcNAcb-Sp8                                                                                                                                                                                                        | 84 | 28 |
| 284 | Neu5Gca2-6Galβ1-4GlcNAcb-Sp0                                                                                                                                                                                                     | 84 | 10 |
| 271 | Neu5Aca2-6Galβ1-4Glc-Sp8                                                                                                                                                                                                         | 83 | 11 |
| 331 | GalNAcβ1-3Galα1-4Galβ1-4GlcNAcβ1-3Galβ1-4Glc-Sp0                                                                                                                                                                                 | 83 | 13 |
| 488 | Galβ1-4(Fuca1-3)GlcNAcβ1-6(Neu5Aca2-6(Neu5Aca2-3Galβ1-3)GlcNAcβ1-3)Galβ1-4Glc-Sp21                                                                                                                                               | 83 | 6  |
| 153 | Galβ1-4(Fuca1-3)GlcNAcβ1-3Galβ1-4(Fuca1-3)GlcNAcb-Sp0                                                                                                                                                                            | 83 | 12 |
| 57  | Neu5Aca2-6Galβ1-4GlcNAcβ1-2Manα1-6(Neu5Aca2-6Galβ1-4GlcNAcβ1-2Manα1-3)Manβ1-4GlcNAcβ1-4GlcNAcb-Sp24                                                                                                                              | 82 | 7  |
| 177 | GlcNAcβ1-6(GlcNAcβ1-3)GalNAca-Sp14                                                                                                                                                                                               | 82 | 24 |
| 304 | GalNAcβ1-3Galb-Sp8                                                                                                                                                                                                               | 82 | 33 |
| 399 | Galα1-4Galβ1-3GlcNAcβ1-2Manα1-6(Galα1-4Galβ1-3GlcNAcβ1-2Manα1-3)Manβ1-4GlcNAcβ1-4GlcNAcb-Sp19                                                                                                                                    | 82 | 7  |
| 473 | Neu5Aca2-3Galβ1-4GlcNAcβ1-2Manα-Sp0                                                                                                                                                                                              | 82 | 17 |
| 77  | Fuca1-2Galβ1-4Glc-Sp0                                                                                                                                                                                                            | 82 | 13 |
| 326 | Neu5,9Ac2α2-3Galβ1-3GlcNAcb-Sp0                                                                                                                                                                                                  | 82 | 9  |
| 156 | Galβ1-4(6S)Glc-Sp8                                                                                                                                                                                                               | 81 | 27 |
| 199 | Glcβ1-6Glc-Sp8                                                                                                                                                                                                                   | 81 | 16 |
| 378 | Galβ1-3GlcNAcβ1-3Galβ1-4GlcNAcβ1-6(Galβ1-3GlcNAcβ1-3)Galβ1-4Glc-Sp0                                                                                                                                                              | 81 | 36 |
| 531 | GalNAca1-3(Fuca1-2)Galβ1-3GalNAcβ1-3Galα1-4Galβ1-4Glc-Sp21                                                                                                                                                                       | 81 | 8  |
| 69  | Fuca1-2Galβ1-4(Fuca1-3)GlcNAcβ1-3Galβ1-4(Fuca1-3)GlcNAcb-Sp0                                                                                                                                                                     | 81 | 8  |
| 285 | Neu5Gca-Sp8                                                                                                                                                                                                                      | 81 | 22 |
| 500 | Fuca1-2Galβ1-3GlcNAcβ1-6(Fuca1-2Galβ1-3GlcNAcβ1-3)GalNAca-Sp14                                                                                                                                                                   | 81 | 34 |
| 122 | Galα1-4Galβ1-4Glc-Sp0                                                                                                                                                                                                            | 80 | 19 |
| 295 | (6S)Galβ1-4(6S)GlcNAcb-Sp0                                                                                                                                                                                                       | 80 | 25 |
| 419 | Galα1-3(Fuca1-2)Galβ1-3GlcNAcβ1-3GalNAc-Sp14                                                                                                                                                                                     | 80 | 7  |
| 553 | GalNAcβ1-4GlcNAcβ1-3GalNAcβ1-4GlcNAcb-Sp0                                                                                                                                                                                        | 80 | 18 |
| 585 | GlcNAcβ1-3Galβ1-4GlcNAcβ1-6(GlcNAcβ1-3Galβ1-4GlcNAcβ1-3)GalNAca-Sp14                                                                                                                                                             | 80 | 11 |
| 234 | Neu5Aca2-6(Neu5Aca2-3)GalNAca-Sp8                                                                                                                                                                                                | 79 | 27 |
| 299 | Neu5Aca2-6Galβ1-4GlcNAcβ1-2Manα1-6(Galβ1-4GlcNAcβ1-2Manα1-3)Manβ1-4GlcNAcβ1-4GlcNAcb-Sp12                                                                                                                                        | 79 | 13 |
| 144 | Galβ1-3GalNAcβ1-4(Neu5Aca2-3)Galβ1-4Glc-Sp0                                                                                                                                                                                      | 79 | 7  |
| 282 | Neu5Gca2-3Galβ1-4Glc-Sp0                                                                                                                                                                                                         | 79 | 12 |
| 333 | GalNAca1-3(Fuca1-2)Galβ1-4GlcNAcβ1-3Galβ1-4GlcNAcβ1-3Galβ1-4GlcNAcb-Sp0                                                                                                                                                          | 79 | 16 |
| 444 | Galβ1-4GlcNAcβ1-2Manα-Sp0                                                                                                                                                                                                        | 79 | 18 |
| 133 | GlcNAcβ1-6(Galβ1-3)GalNAca-Sp8                                                                                                                                                                                                   | 79 | 21 |
| 556 | GlcNAβ1-3Galβ1-3GalNAc-Sp14                                                                                                                                                                                                      | 79 | 59 |
| 115 | Galα1-3Galβ1-4GlcNAcb-Sp8                                                                                                                                                                                                        | 78 | 8  |
| 233 | Neu5Aca2-3Galβ1-3GalNAcβ1-4(Neu5Aca2-3)Galβ1-4Glc-Sp0                                                                                                                                                                            | 78 | 11 |
| 81  | Fucβ1-3GlcNAcb-Sp8                                                                                                                                                                                                               | 77 | 7  |
| 366 | Galβ1-4GlcNAcβ1-2Manα1-6(Galβ1-4GlcNAcβ1-4(Galβ1-4GlcNAcβ1-2)Manα1-3)Manβ1-4GlcNAcβ1-4GlcNAc-Sp21                                                                                                                                | 77 | 15 |
| 142 | Galβ1-3GalNAcb-Sp8                                                                                                                                                                                                               | 77 | 16 |
| 94  | GalNAcβ1-3GalNAca-Sp8                                                                                                                                                                                                            | 77 | 6  |
| 95  | GalNAcβ1-3(Fuca1-2)Galb-Sp8                                                                                                                                                                                                      | 77 | 11 |
| 34  | (3S)Galβ1-4(6S)GlcNAcb-Sp0                                                                                                                                                                                                       | 77 | 5  |
| 178 | GlcNAcβ1-6(GlcNAcβ1-3)Galβ1-4GlcNAcb-Sp8                                                                                                                                                                                         | 77 | 15 |
| 262 | Neu5Aca2-3Galβ1-4Glc-Sp8                                                                                                                                                                                                         | 76 | 9  |
| 187 | GlcNAcβ1-6(GlcNAcβ1-4)GalNAca-Sp8                                                                                                                                                                                                | 76 | 10 |
| 101 | Galα1-3(Fuca1-2)Galβ1-3GlcNAcb-Sp0                                                                                                                                                                                               | 76 | 10 |
| 332 | GalNAca1-3(Fuca1-2)Galβ1-4GlcNAcβ1-3Galβ1-4GlcNAcb-Sp0                                                                                                                                                                           | 76 | 21 |
| 33  | (3S)Galβ1-4(Fuca1-3)GlcNAc-Sp8                                                                                                                                                                                                   | 76 | 11 |
| 60  | Fuca1-2Galβ1-3(Fuca1-4)GlcNAcb-Sp8                                                                                                                                                                                               | 76 | 11 |

|     |                                                                                                                                                                                                                                                                                                                         |    |    |
|-----|-------------------------------------------------------------------------------------------------------------------------------------------------------------------------------------------------------------------------------------------------------------------------------------------------------------------------|----|----|
| 136 | Neu5Ac $\alpha$ 2-6(Gal $\beta$ 1-3)GalNAcA-Sp14                                                                                                                                                                                                                                                                        | 76 | 18 |
| 517 | Gal $\alpha$ 1-3(Fuca1-2)Gal $\beta$ 1-4GlcNAc $\beta$ 1-2Mana-Sp0                                                                                                                                                                                                                                                      | 76 | 12 |
| 191 | GlcNAc $\beta$ 1-4GlcNAc $\beta$ 1-4GlcNAcb-Sp8                                                                                                                                                                                                                                                                         | 75 | 10 |
| 20  | Gal $\beta$ 1-4GlcNAc $\beta$ 1-6(Gal $\beta$ 1-4GlcNAc $\beta$ 1-3)GalNAc-Sp14                                                                                                                                                                                                                                         | 75 | 20 |
| 109 | Gal $\alpha$ 1-4(Gal $\alpha$ 1-3)Gal $\beta$ 1-4GlcNAcb-Sp8                                                                                                                                                                                                                                                            | 75 | 16 |
| 225 | GalNAc $\beta$ 1-4(Neu5Ac $\alpha$ 2-8Neu5Ac $\alpha$ 2-8Neu5Ac $\alpha$ 2-3)Gal $\beta$ 1-4Glc-Sp0                                                                                                                                                                                                                     | 75 | 15 |
| 509 | GalNAc $\beta$ 1-4(6S)GlcNAc-Sp8                                                                                                                                                                                                                                                                                        | 75 | 16 |
| 50  | Man $\alpha$ 1-6(Man $\alpha$ 1-3)Man $\beta$ 1-4GlcNAc $\beta$ 1-4GlcNAcb-Sp12                                                                                                                                                                                                                                         | 75 | 25 |
| 298 | Gal $\beta$ 1-3Gal $\beta$ 1-4GlcNAcb-Sp8                                                                                                                                                                                                                                                                               | 75 | 11 |
| 205 | KDN $\alpha$ 2-3Gal $\beta$ 1-3GlcNAcb-Sp0                                                                                                                                                                                                                                                                              | 74 | 17 |
| 565 | Gal $\beta$ 1-4GlcNAc $\beta$ 1-3Gal $\beta$ 1-4GlcNAc $\beta$ 1-2Man $\alpha$ 1-6(Gal $\beta$ 1-4GlcNAc $\beta$ 1-3Gal $\beta$ 1-4GlcNAc $\beta$ 1-2Man $\alpha$ 1-3)Man $\beta$ 1-4GlcNAc $\beta$ 1-4(Fuca1-6)GlcNAcb-Sp24                                                                                            | 74 | 9  |
| 226 | GalNAc $\beta$ 1-4(Neu5Ac $\alpha$ 2-8Neu5Ac $\alpha$ 2-8Neu5Ac $\alpha$ 2-3)Gal $\beta$ 1-4Glc-Sp0                                                                                                                                                                                                                     | 74 | 13 |
| 229 | Neu5Ac $\alpha$ 2-8Neu5Ac $\alpha$ 2-8Neu5Ac-Sp8                                                                                                                                                                                                                                                                        | 74 | 18 |
| 303 | Gal $\beta$ 1-4GlcNAc $\beta$ 1-6Gal $\beta$ 1-4GlcNAcb-Sp0                                                                                                                                                                                                                                                             | 74 | 13 |
| 463 | Gal $\alpha$ 1-3(Fuca1-2)Gal $\beta$ 1-3GalNAcA-Sp8                                                                                                                                                                                                                                                                     | 74 | 6  |
| 486 | Neu5Ac $\alpha$ 2-3Gal $\beta$ 1-3GlcNAc $\beta$ 1-6GalNAcA-Sp14                                                                                                                                                                                                                                                        | 74 | 9  |
| 243 | Neu5Ac $\alpha$ 2-6(Neu5Ac $\alpha$ 2-3Gal $\beta$ 1-3)GalNAcA-Sp14                                                                                                                                                                                                                                                     | 74 | 19 |
| 327 | Neu5Ac $\alpha$ 2-6Gal $\beta$ 1-4GlcNAc $\beta$ 1-3Gal $\beta$ 1-3GlcNAcb-Sp0                                                                                                                                                                                                                                          | 74 | 12 |
| 311 | Man $\alpha$ 1-6Man $\beta$ -Sp10                                                                                                                                                                                                                                                                                       | 73 | 10 |
| 110 | Gal $\alpha$ 1-3GalNAcA-Sp8                                                                                                                                                                                                                                                                                             | 73 | 16 |
| 365 | Gal $\beta$ 1-4(Fuca1-3)GlcNAc $\beta$ 1-6(Fuca1-2Gal $\beta$ 1-4GlcNAc $\beta$ 1-3)Gal $\beta$ 1-4Glc-Sp21                                                                                                                                                                                                             | 73 | 8  |
| 379 | Gal $\beta$ 1-4(Fuca1-3)GlcNAc $\beta$ 1-6(Gal $\beta$ 1-3GlcNAc $\beta$ 1-3)Gal $\beta$ 1-4Glc-Sp21                                                                                                                                                                                                                    | 73 | 10 |
| 294 | 4S(3S)Gal $\beta$ 1-4GlcNAcb-Sp0                                                                                                                                                                                                                                                                                        | 72 | 6  |
| 599 | GlcNAc $\beta$ 1-3Fuca-Sp21                                                                                                                                                                                                                                                                                             | 72 | 5  |
| 257 | Neu5Ac $\alpha$ 2-3Gal $\beta$ 1-4GlcNAcb-Sp0                                                                                                                                                                                                                                                                           | 72 | 5  |
| 141 | Gal $\beta$ 1-3GalNAcA-Sp16                                                                                                                                                                                                                                                                                             | 72 | 2  |
| 56  | Neu5Ac $\alpha$ 2-6Gal $\beta$ 1-4GlcNAc $\beta$ 1-2Man $\alpha$ 1-6(Neu5Ac $\alpha$ 2-6Gal $\beta$ 1-4GlcNAc $\beta$ 1-2Man- $\alpha$ 1-3)Man $\beta$ 1-4GlcNAc $\beta$ 1-4GlcNAcb-Sp21                                                                                                                                | 71 | 14 |
| 402 | Gal $\beta$ 1-3GlcNAc $\beta$ 1-6Gal $\beta$ 1-4GlcNAcb-Sp0                                                                                                                                                                                                                                                             | 71 | 8  |
| 582 | Neu5Ac $\alpha$ 2-3Gal $\beta$ 1-4GlcNAc $\beta$ 1-3Gal $\beta$ 1-4GlcNAc $\beta$ 1-3GalNAcA-Sp14                                                                                                                                                                                                                       | 71 | 15 |
| 105 | Gal $\alpha$ 1-3(Fuca1-2)Gal $\beta$ 1-4GlcNAc-Sp0                                                                                                                                                                                                                                                                      | 71 | 8  |
| 172 | Gal $\beta$ 1-4Glc-Sp8                                                                                                                                                                                                                                                                                                  | 71 | 5  |
| 196 | Glc $\alpha$ 1-4Glc-Sp8                                                                                                                                                                                                                                                                                                 | 71 | 18 |
| 249 | Neu5Ac $\alpha$ 2-3Gal $\beta$ 1-4(6S)GlcNAcb-Sp8                                                                                                                                                                                                                                                                       | 70 | 11 |
| 188 | GlcNAc $\beta$ 1-4Gal $\beta$ 1-4GlcNAcb-Sp8                                                                                                                                                                                                                                                                            | 70 | 8  |
| 287 | Gal $\beta$ 1-3GlcNAc $\beta$ 1-3Gal $\beta$ 1-3GlcNAcb-Sp0                                                                                                                                                                                                                                                             | 70 | 9  |
| 47  | (6S)GlcNAcb-Sp8                                                                                                                                                                                                                                                                                                         | 70 | 12 |
| 523 | GalNAc $\beta$ 1-4GlcNAc $\beta$ 1-2Mana-Sp0                                                                                                                                                                                                                                                                            | 70 | 10 |
| 551 | GlcNAc $\beta$ 1-3Gal $\beta$ 1-4GlcNAc $\beta$ 1-6(GlcNAc $\beta$ 1-3Gal $\beta$ 1-3)GalNAcA-Sp14                                                                                                                                                                                                                      | 70 | 23 |
| 230 | GalNAc $\beta$ 1-4(Neu5Ac $\alpha$ 2-3)Gal $\beta$ 1-4GlcNAcb-Sp0                                                                                                                                                                                                                                                       | 69 | 19 |
| 426 | Fuca1-3GlcNAc $\beta$ 1-6(Gal $\beta$ 1-4GlcNAc $\beta$ 1-3)Gal $\beta$ 1-4Glc-Sp21                                                                                                                                                                                                                                     | 69 | 16 |
| 345 | Neu5Ac $\alpha$ 2-6Gal $\beta$ 1-4GlcNAc $\beta$ 1-2Man $\alpha$ 1-3Man $\beta$ 1-4GlcNAc $\beta$ 1-4GlcNAc-Sp12                                                                                                                                                                                                        | 69 | 17 |
| 485 | Gal $\beta$ 1-3(Fuca1-4)GlcNAc $\beta$ 1-6GalNAcA-Sp14                                                                                                                                                                                                                                                                  | 69 | 24 |
| 563 | Neu5Ac $\alpha$ 2-8Neu5Ac $\alpha$ 2-3Gal $\beta$ 1-3GalNAc $\beta$ 1-4(Neu5Ac $\alpha$ 2-3)Gal $\beta$ 1-4Glc-Sp21                                                                                                                                                                                                     | 69 | 19 |
| 67  | Fuca1-2Gal $\beta$ 1-3GlcNAcb-Sp0                                                                                                                                                                                                                                                                                       | 69 | 12 |
| 235 | Neu5Ac $\alpha$ 2-3GalNAcA-Sp8                                                                                                                                                                                                                                                                                          | 69 | 9  |
| 170 | Gal $\beta$ 1-4GlcNAcb-Sp23                                                                                                                                                                                                                                                                                             | 68 | 8  |
| 308 | GlcNAc $\beta$ 1-4GlcNAcb-Sp10                                                                                                                                                                                                                                                                                          | 68 | 33 |
| 335 | GlcNAc $\alpha$ 1-4Gal $\beta$ 1-4GlcNAc $\beta$ 1-3Gal $\beta$ 1-4GlcNAc $\beta$ 1-3Gal $\beta$ 1-4GlcNAcb-Sp0                                                                                                                                                                                                         | 68 | 12 |
| 462 | Neu5Ac $\alpha$ 2-6Gal $\beta$ 1-4GlcNAc $\beta$ 1-6(Neu5Ac $\alpha$ 2-6Gal $\beta$ 1-4GlcNAc $\beta$ 1-2)Man $\alpha$ 1-6(GlcNAc $\beta$ 1-4)(Neu5Ac $\alpha$ 2-6Gal $\beta$ 1-4GlcNAc $\beta$ 1-4(Neu5Ac $\alpha$ 2-6Gal $\beta$ 1-4GlcNAc $\beta$ 1-2)Man $\alpha$ 1-3)Man $\beta$ 1-4GlcNAc $\beta$ 1-4GlcNAcb-Sp21 | 68 | 7  |
| 11  | Neu5Ac $\beta$ -Sp8                                                                                                                                                                                                                                                                                                     | 68 | 20 |
| 123 | Gal $\alpha$ 1-4GlcNAcb-Sp8                                                                                                                                                                                                                                                                                             | 68 | 4  |

|     |                                                                                                        |    |    |
|-----|--------------------------------------------------------------------------------------------------------|----|----|
| 35  | (3S)Galβ1-4(6S)GlcNAcb-Sp8                                                                             | 68 | 16 |
| 270 | Neu5Acα2-6Galβ1-4Glc-Sp0                                                                               | 68 | 8  |
| 286 | Neu5Acα2-3Galβ1-4GlcNAcβ1-6(Galβ1-3)GalNAca-Sp14                                                       | 68 | 8  |
| 340 | GlcNAcα1-4Galβ1-4GlcNAcβ1-3Galβ1-4GlcNAcb-Sp0                                                          | 68 | 14 |
| 408 | Neu5Acα2-3Galβ1-3GalNAcβ1-4(Neu5Acα2-8Neu5Acα2-3)Galβ1-4Glc-Sp0                                        | 68 | 13 |
| 154 | Galβ1-4(Fuca1-3)GlcNAcβ1-3Galβ1-4(Fuca1-3)GlcNAcβ1-3Galβ1-4(Fuca1-3)GlcNAcb-Sp0                        | 67 | 11 |
| 220 | Fuca1-2(6S)Galβ1-4GlcNAcb-Sp0                                                                          | 67 | 11 |
| 157 | Galβ1-4GalNAcα1-3(Fuca1-2)Galβ1-4GlcNAcb-Sp8                                                           | 67 | 13 |
| 258 | Neu5Acα2-3Galβ1-4GlcNAcb-Sp8                                                                           | 67 | 11 |
| 337 | GlcNAcα1-4Galβ1-3GlcNAcb-Sp0                                                                           | 67 | 20 |
| 203 | GlcAβ1-3Galb-Sp8                                                                                       | 66 | 7  |
| 307 | GlcNAcβ1-3Man-Sp10                                                                                     | 66 | 24 |
| 495 | Fuca1-2Galβ1-3(6S)GlcNAcb-Sp0                                                                          | 66 | 8  |
| 155 | Galβ1-4(6S)Glc-Sp0                                                                                     | 66 | 3  |
| 253 | Neu5Acα2-3Galβ1-4(Fuca1-3)GlcNAcb-Sp8                                                                  | 66 | 17 |
| 151 | Galβ1-4(Fuca1-3)GlcNAcb-Sp0                                                                            | 66 | 14 |
| 263 | Neu5Acα2-6GalNAca-Sp8                                                                                  | 66 | 39 |
| 323 | Neu5Acα2-3Galβ1-4GlcNAcβ1-2Mana1-6(Neu5Acα2-6Galβ1-4GlcNAcβ1-2Mana1-3)Manβ1-4GlcNAcβ1-4GlcNAcb-Sp12    | 66 | 24 |
| 580 | Galβ1-4GlcNAcβ1-3Galβ1-4GlcNAcβ1-6(Galβ1-3)GalNAca-Sp14                                                | 66 | 21 |
| 447 | GalNAcα1-3(Fuca1-2)Galβ1-4GlcNAcβ1-6(GalNAcα1-3(Fuca1-2)Galβ1-4GlcNAcβ1-3)GalNAc-Sp14                  | 65 | 15 |
| 532 | Galα1-3(Fuca1-2)Galβ1-3GalNAcβ1-3Galα1-4Galβ1-4Glc-Sp21                                                | 65 | 13 |
| 64  | Fuca1-2Galβ1-3GalNAcβ1-4(Neu5Acα2-3)Galβ1-4Glc-Sp9                                                     | 65 | 5  |
| 273 | Neu5Acα2-8Neu5Acα-Sp8                                                                                  | 65 | 8  |
| 422 | Fuca1-2Galβ1-3GlcNAcβ1-2Mana1-6(Fuca1-2Galβ1-3GlcNAcβ1-2Mana1-3)Manβ1-4GlcNAcβ1-4(Fuca1-6)GlcNAcb-Sp22 | 65 | 10 |
| 482 | Neu5Acα2-6Galβ1-4GlcNAcβ1-6(Fuca1-2Galβ1-4(Fuca1-3)GlcNAcβ1-3)Galβ1-4Glc-Sp21                          | 65 | 13 |
| 529 | Neu5Acα2-3Galβ1-4(Fuca1-3)GlcNAcβ1-2Mana-Sp0                                                           | 65 | 12 |
| 159 | Galβ1-4GlcNAcβ1-3GalNAca-Sp8                                                                           | 65 | 13 |
| 217 | Manβ1-4GlcNAcb-Sp0                                                                                     | 64 | 17 |
| 63  | Fuca1-2Galβ1-3GalNAcβ1-4(Neu5Acα2-3)Galβ1-4Glc-Sp0                                                     | 64 | 10 |
| 212 | Mana1-2Mana1-6(Mana1-2Mana1-3)Mana1-6(Mana1-2Mana1-2Mana1-3)Manβ1-4GlcNAcβ1-4GlcNAcb-Sp12              | 64 | 3  |
| 325 | Neu5,9Ac2α2-3Galβ1-4GlcNAcb-Sp0                                                                        | 64 | 44 |
| 176 | GlcNAcβ1-6(GlcNAcβ1-3)GalNAca-Sp8                                                                      | 64 | 7  |
| 197 | Glcα1-6Glcα1-6Glc-Sp8                                                                                  | 64 | 31 |
| 206 | KDNα2-3Galβ1-4GlcNAcb-Sp0                                                                              | 64 | 13 |
| 250 | Neu5Acα2-3Galβ1-4(Fuca1-3)(6S)GlcNAcb-Sp8                                                              | 64 | 8  |
| 301 | GlcNAcβ1-6(Galβ1-4GlcNAcβ1-3)Galβ1-4GlcNAc-Sp0                                                         | 64 | 5  |
| 310 | MurNAcβ1-4GlcNAcb-Sp10                                                                                 | 64 | 7  |
| 584 | GlcNAcβ1-3Galβ1-4GlcNAcβ1-6(Galβ1-3)GalNAca-Sp14                                                       | 64 | 15 |
| 266 | Neu5Acα2-6Galβ1-4GlcNAcb-Sp0                                                                           | 63 | 18 |
| 267 | Neu5Acα2-6Galβ1-4GlcNAcb-Sp8                                                                           | 63 | 14 |
| 269 | Neu5Acα2-6Galβ1-4GlcNAcβ1-3Galβ1-4GlcNAcb-Sp0                                                          | 63 | 5  |
| 116 | Galα1-3Galβ1-4Glc-Sp0                                                                                  | 63 | 14 |
| 293 | Neu5Acα2-3Galβ1-4GlcNAcβ1-3Galβ1-3GlcNAcb-Sp0                                                          | 63 | 4  |
| 396 | Fuca1-2Galβ1-4GlcNAcβ1-3GalNAca-Sp14                                                                   | 63 | 16 |
| 23  | 6S(3S)Galβ1-4GlcNAcb-Sp0                                                                               | 62 | 7  |
| 130 | Fuca1-4(Galβ1-3)GlcNAcb-Sp8                                                                            | 62 | 10 |
| 474 | Neu5Acα2-3Galβ1-4GlcNAcβ1-6GalNAca-Sp14                                                                | 62 | 9  |
| 65  | Fuca1-2Galβ1-3GlcNAcβ1-3Galβ1-4Glc-Sp8                                                                 | 62 | 9  |
| 329 | Neu5Acα2-6Galβ1-4GlcNAcβ1-3Galβ1-4GlcNAcβ1-3Galβ1-4GlcNAcb-Sp0                                         | 62 | 7  |
| 600 | Galβ1-3GalNAcβ1-4(Neu5Acα2-8Neu5Acα2-8Neu5Acα2-3)Galβ1-4Glc-Sp21                                       | 62 | 9  |
| 259 | Neu5Acα2-3Galβ1-4GlcNAcβ1-3Galβ1-4GlcNAcb-Sp0                                                          | 62 | 6  |
| 524 | Neu5Acα2-3Galβ1-3GalNAcβ1-4Galβ1-4Glc-Sp0                                                              | 62 | 13 |



|     |                                                                                                                                   |    |    |
|-----|-----------------------------------------------------------------------------------------------------------------------------------|----|----|
| 227 | Neu5Acα2-8Neu5Acα2-8Neu5Acα2-3Galβ1-4GlcB-Sp0                                                                                     | 62 | 5  |
| 343 | Manα1-6(Neu5Acα2-6Galβ1-4GlcNAcβ1-2Manα1-3)Manβ1-4GlcNAcβ1-4GlcNAc-Sp12                                                           | 62 | 9  |
| 385 | Fuca1-2Galβ1-3GalNAcα1-3(Fuca1-2)Galβ1-4GlcB-Sp0                                                                                  | 62 | 9  |
| 7   | Fuca-Sp9                                                                                                                          | 61 | 19 |
| 13  | GlcB-Sp8                                                                                                                          | 61 | 2  |
| 91  | GalNAcα1-3GalNAcB-Sp8                                                                                                             | 61 | 12 |
| 305 | GlcAβ1-3GlcNAcB-Sp8                                                                                                               | 61 | 12 |
| 149 | Galβ1-3GlcNAcB-Sp0                                                                                                                | 61 | 23 |
| 99  | GalNAcβ1-4GlcNAcB-Sp8                                                                                                             | 61 | 5  |
| 254 | Neu5Acα2-3Galβ1-4(Fuca1-3)GlcNAcβ1-3GalB-Sp8                                                                                      | 61 | 8  |
| 296 | (6P)GlcB-Sp10                                                                                                                     | 61 | 8  |
| 430 | GlcNAcβ1-6(GlcNAcβ1-2)Manα1-6(GlcNAcβ1-4)(GlcNAcβ1-4)(GlcNAcβ1-2)Manα1-3)Manβ1-4GlcNAcβ1-4GlcNAc-Sp21                             | 61 | 7  |
| 55  | Neu5Acα2-6Galβ1-4GlcNAcβ1-2Manα1-6(Neu5Acα2-6Galβ1-4GlcNAcβ1-2Manα1-3)Manβ1-4GlcNAcβ1-4GlcNAcB-Sp12                               | 61 | 7  |
| 175 | GlcNAcβ1-2Galβ1-3GalNAcA-Sp8                                                                                                      | 61 | 13 |
| 124 | Galα1-6GlcB-Sp8                                                                                                                   | 60 | 7  |
| 586 | Neu5Acα2-3Galβ1-4GlcNAcβ1-3Galβ1-4GlcNAcβ1-6(Neu5Acα2-3Galβ1-4GlcNAcβ1-3Galβ1-4GlcNAcβ1-3)GalNAcA-Sp14                            | 60 | 9  |
| 182 | GlcNAcβ1-3Galβ1-4GlcNAcB-Sp0                                                                                                      | 60 | 15 |
| 194 | GlcNAcβ1-6Galβ1-4GlcNAcB-Sp8                                                                                                      | 60 | 14 |
| 418 | Fuca1-2Galβ1-3GlcNAcβ1-3GalNAc-Sp14                                                                                               | 60 | 17 |
| 398 | GalNAcα1-3GalNAcβ1-3Galα1-4Galβ1-4GlcNAcB-Sp0                                                                                     | 60 | 24 |
| 579 | Galβ1-4GlcNAcβ1-3Galβ1-4GlcNAcβ1-3GalNAcA-Sp14                                                                                    | 60 | 30 |
| 395 | Neu5Acα2-3Galβ1-3GlcNAcβ1-3GalNAcA-Sp14                                                                                           | 60 | 19 |
| 434 | Galβ1-4GlcNAcβ1-6(Galβ1-4GlcNAcβ1-2)Manα1-6(GlcNAcβ1-4)(Galβ1-4GlcNAcβ1-4)(Galβ1-4GlcNAcβ1-2)Manα1-3)Manβ1-4GlcNAcβ1-4GlcNAc-Sp21 | 60 | 3  |
| 377 | Galβ1-3GalNAcα1-3(Fuca1-2)Galβ1-4GlcNAc-Sp0                                                                                       | 59 | 20 |
| 386 | Fuca1-2Galβ1-3GalNAcα1-3(Fuca1-2)Galβ1-4GlcNAcB-Sp0                                                                               | 59 | 11 |
| 401 | Galα1-3Galβ1-4GlcNAcβ1-3GalNAcA-Sp14                                                                                              | 59 | 19 |
| 476 | Neu5Acα2-6Galβ1-4GlcNAcβ1-6(Neu5Acα2-6Galβ1-4GlcNAcβ1-3)GalNAcA-Sp14                                                              | 59 | 11 |
| 73  | Fuca1-2Galβ1-4GlcNAcβ1-3Galβ1-4GlcNAcB-Sp0                                                                                        | 59 | 13 |
| 174 | GlcNAcα1-6Galβ1-4GlcNAcB-Sp8                                                                                                      | 59 | 7  |
| 590 | Neu5Acα2-3Galβ1-4GlcNAcβ1-3Galβ1-4GlcNAcβ1-6(Galβ1-3)GalNAcA-Sp14                                                                 | 59 | 8  |
| 322 | Neu5Acα2-3Galβ1-4GlcNAcβ1-2Manα1-6(Neu5Acα2-3Galβ1-4GlcNAcβ1-2Manα1-3)Manβ1-4GlcNAcβ1-4GlcNAcB-Sp12                               | 59 | 17 |
| 342 | Neu5Acα2-6Galβ1-4GlcNAcβ1-2Manα1-6(Manα1-3)Manβ1-4GlcNAcβ1-4GlcNAc-Sp12                                                           | 59 | 4  |
| 309 | GlcNAcβ1-4GlcNAcB-Sp12                                                                                                            | 59 | 5  |
| 148 | Galβ1-3GlcNAcβ1-3Galβ1-4GlcB-Sp10                                                                                                 | 58 | 9  |
| 36  | (3S)Galβ1-4GlcNAcB-Sp0                                                                                                            | 58 | 20 |
| 336 | GlcNAcα1-4Galβ1-4GlcNAcB-Sp0                                                                                                      | 58 | 10 |
| 475 | Neu5Acα2-6Galβ1-4GlcNAcβ1-6GalNAcA-Sp14                                                                                           | 58 | 16 |
| 40  | (4S)Galβ1-4GlcNAcB-Sp8                                                                                                            | 58 | 15 |
| 244 | Neu5Acα2-3GalB-Sp8                                                                                                                | 58 | 4  |
| 31  | (3S)Galβ1-3GlcNAcB-Sp8                                                                                                            | 57 | 12 |
| 373 | Neu5Acα2-6Galβ1-4GlcNAcβ1-3GalNAc-Sp14                                                                                            | 57 | 18 |
| 381 | Galβ1-4(Fuca1-3)GlcNAcβ1-6(Fuca1-4(Fuca1-2Galβ1-3)GlcNAcβ1-3)Galβ1-4Glc-Sp21                                                      | 57 | 8  |
| 211 | Manα1-2Manα1-6(Manα1-3)Manα1-6(Manα1-2Manα1-2Manα1-3)Manβ1-4GlcNAcβ1-4GlcNAcB-Sp12                                                | 57 | 17 |
| 452 | Neu5Acα2-6Galβ1-4GlcNAcβ1-6(Fuca1-2Galβ1-3GlcNAcβ1-3)Galβ1-4Glc-Sp21                                                              | 57 | 4  |
| 180 | GlcNAcβ1-3GalNAcA-Sp14                                                                                                            | 57 | 7  |
| 200 | G-ol-Sp8                                                                                                                          | 57 | 4  |
| 439 | (6S)Galβ1-3GlcNAcB-Sp0                                                                                                            | 57 | 5  |
| 98  | GalNAcβ1-4GlcNAcB-Sp0                                                                                                             | 57 | 17 |
| 209 | Manα1-2Manα1-3Mana-Sp9                                                                                                            | 57 | 5  |
| 292 | Neu5Acα2-3Galβ1-3GlcNAcβ1-3Galβ1-3GlcNAcB-Sp0                                                                                     | 57 | 11 |
| 498 | GalNAcβ1-4(Fuca1-3)(6S)GlcNAcB-Sp8                                                                                                | 57 | 13 |
| 185 | GlcNAcβ1-3Galβ1-4GlcB-Sp0                                                                                                         | 56 | 13 |

|     |                                                                                                                                              |    |    |
|-----|----------------------------------------------------------------------------------------------------------------------------------------------|----|----|
| 228 | GalNAcβ1-4(Neu5Acα2-8Neu5Acα2-3)Galβ1-4Glc-Sp0                                                                                               | 56 | 14 |
| 280 | Neu5Gcα2-3Galβ1-4(Fuca1-3)GlcNAc-Sp0                                                                                                         | 56 | 13 |
| 324 | Galβ1-4(Fuca1-3)GlcNAcβ1-2Manα1-6(Galβ1-4(Fuca1-3)GlcNAcβ1-2Manα1-3)Manβ1-4GlcNAcβ1-4GlcNAc-Sp20                                             | 56 | 22 |
| 406 | Galβ1-4GlcNAcβ1-6(Neu5Acα2-6Galβ1-3GlcNAcβ1-3)Galβ1-4Glc-Sp21                                                                                | 56 | 24 |
| 436 | Galβ1-6Gal-Sp10                                                                                                                              | 56 | 16 |
| 461 | Neu5Acα2-6Galβ1-4GlcNAcβ1-6(Neu5Acα2-6Galβ1-4GlcNAcβ1-2)Manα1-6(GlcNAcβ1-4)(Neu5Acα2-6Galβ1-4GlcNAcβ1-2Manα1-3)Manβ1-4GlcNAcβ1-4GlcNAc-Sp21  | 56 | 14 |
| 4   | GalNAc-Sp8                                                                                                                                   | 56 | 19 |
| 484 | Galα1-3Galβ1-3GlcNAcβ1-6GalNAc-Sp14                                                                                                          | 56 | 3  |
| 387 | Galβ1-3GlcNAcβ1-3GalNAc-Sp14                                                                                                                 | 56 | 19 |
| 425 | Galβ1-4GlcNAcβ1-6(Fuca1-2Galβ1-3GlcNAcβ1-3)Galβ1-4Glc-Sp21                                                                                   | 56 | 31 |
| 16  | GlcNAc-Sp0                                                                                                                                   | 56 | 5  |
| 42  | (6S)Galβ1-4Glc-Sp0                                                                                                                           | 56 | 10 |
| 74  | Fuca1-2Galβ1-4GlcNAcβ1-3Galβ1-4GlcNAcβ1-3Galβ1-4GlcNAc-Sp0                                                                                   | 56 | 16 |
| 317 | Galβ1-4GlcNAcβ1-2Manα1-6(Neu5Acα2-6Galβ1-4GlcNAcβ1-2Manα1-3)Manβ1-4GlcNAcβ1-4GlcNAc-Sp12                                                     | 56 | 8  |
| 421 | Galα1-3Galβ1-3GlcNAcβ1-3GalNAc-Sp14                                                                                                          | 56 | 13 |
| 538 | GlcNAcβ1-3Galβ1-4GlcNAcβ1-3Galβ1-4GlcNAcβ1-2Manα1-6(GlcNAcβ1-3Galβ1-4GlcNAcβ1-3Galβ1-4GlcNAcβ1-2Manα1-3)Manβ1-4GlcNAcβ1-4GlcNAc-Sp25         | 56 | 33 |
| 583 | GlcNAcβ1-3Galβ1-4GlcNAcβ1-3GalNAc-Sp14                                                                                                       | 56 | 6  |
| 22  | 6S(3S)Galβ1-4(6S)GlcNAc-Sp0                                                                                                                  | 55 | 5  |
| 277 | Neu5Acβ2-6Galβ1-4GlcNAc-Sp8                                                                                                                  | 55 | 6  |
| 516 | Galα1-3Galβ1-4GlcNAcβ1-2Man-Sp0                                                                                                              | 55 | 8  |
| 17  | GlcNAc-Sp8                                                                                                                                   | 55 | 18 |
| 37  | (3S)Galβ1-4GlcNAc-Sp8                                                                                                                        | 55 | 32 |
| 164 | Galβ1-4GlcNAcβ1-3Galβ1-4Glc-Sp0                                                                                                              | 55 | 10 |
| 347 | Galβ1-4GlcNAcβ1-2Manα1-6Manβ1-4GlcNAcβ1-4GlcNAc-Sp12                                                                                         | 55 | 12 |
| 173 | GlcNAcα1-3Galβ1-4GlcNAc-Sp8                                                                                                                  | 55 | 11 |
| 30  | (3S)Galβ1-3GlcNAc-Sp0                                                                                                                        | 55 | 23 |
| 129 | Galβ1-3(Fuca1-4)GlcNAc-Sp8                                                                                                                   | 55 | 18 |
| 315 | Neu5Acα2-3Galβ1-4GlcNAcβ1-6(Neu5Acα2-3Galβ1-3)GalNAc-Sp14                                                                                    | 55 | 12 |
| 134 | GlcNAcβ1-6(Galβ1-3)GalNAc-Sp14                                                                                                               | 54 | 14 |
| 246 | Neu5Acα2-3Galβ1-3GlcNAcβ1-3Galβ1-4GlcNAc-Sp0                                                                                                 | 54 | 3  |
| 364 | Neu5Acα2-6GlcNAcβ1-4GlcNAcβ1-4GlcNAc-Sp21                                                                                                    | 54 | 14 |
| 376 | Galβ1-3GalNAcα1-3(Fuca1-2)Galβ1-4Glc-Sp0                                                                                                     | 54 | 17 |
| 460 | Neu5Acα2-6Galβ1-4GlcNAcβ1-4Manα1-6(GlcNAcβ1-4)(Neu5Acα2-6Galβ1-4GlcNAcβ1-4)(Neu5Acα2-6Galβ1-4GlcNAcβ1-2)Manα1-3)Manβ1-4GlcNAcβ1-4GlcNAc-Sp21 | 54 | 14 |
| 515 | Neu5Acα2-6Galβ1-4GlcNAcβ1-2Man-Sp0                                                                                                           | 54 | 18 |
| 520 | Galα1-3(Fuca1-2)Galβ1-3GlcNAcβ1-6GalNAc-Sp14                                                                                                 | 54 | 19 |
| 527 | Galβ1-4GlcNAcβ1-2 Manα1-6(Galβ1-4GlcNAcβ1-4)(Galβ1-4GlcNAcβ1-2Manα1-3)Manβ1-4GlcNAcβ1-4(Fuca1-6)GlcNAc-Sp21                                  | 54 | 5  |
| 117 | Galα1-3Galβ1-4Glc-Sp10                                                                                                                       | 54 | 8  |
| 276 | Neu5Acβ2-6GalNAc-Sp8                                                                                                                         | 54 | 12 |
| 344 | Neu5Acα2-6Galβ1-4GlcNAcβ1-2Manα1-6Manβ1-4GlcNAcβ1-4GlcNAc-Sp12                                                                               | 54 | 11 |
| 428 | GlcNAcβ1-2Manα1-6(GlcNAcβ1-4)(GlcNAcβ1-4)(GlcNAcβ1-2)Manα1-3)Manβ1-4GlcNAcβ1-4GlcNAc-Sp21                                                    | 54 | 17 |
| 87  | GalNAcα1-3(Fuca1-2)Galβ1-4Glc-Sp0                                                                                                            | 54 | 26 |
| 190 | GlcNAcβ1-4GlcNAcβ1-4GlcNAcβ1-4GlcNAcβ1-4GlcNAcβ1-4GlcNAcβ1-Sp8                                                                               | 54 | 6  |
| 302 | Galβ1-4GlcNAcα1-6Galβ1-4GlcNAc-Sp0                                                                                                           | 54 | 8  |
| 407 | Galβ1-3GalNAcβ1-4(Neu5Acα2-8Neu5Acα2-3)Galβ1-4Glc-Sp0                                                                                        | 53 | 5  |
| 409 | Galα1-3(Fuca1-2)Galβ1-4GlcNAcβ1-3GalNAc-Sp14                                                                                                 | 53 | 12 |
| 493 | Galα1-3(Fuca1-2)Galβ1-4GlcNAcβ1-6GalNAc-Sp14                                                                                                 | 53 | 10 |
| 44  | (6S)Galβ1-4GlcNAc-Sp8                                                                                                                        | 53 | 19 |
| 160 | Galβ1-4GlcNAcβ1-3GalNAc-Sp14                                                                                                                 | 53 | 13 |
| 411 | GalNAcα1-3GalNAcβ1-3Galα1-4Galβ1-4Glc-Sp0                                                                                                    | 53 | 5  |
| 68  | Fuca1-2Galβ1-3GlcNAc-Sp8                                                                                                                     | 53 | 7  |
| 163 | Galβ1-4GlcNAcβ1-3Galβ1-4GlcNAc-Sp0                                                                                                           | 53 | 16 |
| 279 | Neu5Gcα2-3Galβ1-3GlcNAc-Sp0                                                                                                                  | 53 | 16 |

|     |                                                                                                                                                                                             |    |    |
|-----|---------------------------------------------------------------------------------------------------------------------------------------------------------------------------------------------|----|----|
| 43  | (6S)Galβ1-4GlcB-Sp8                                                                                                                                                                         | 53 | 12 |
| 113 | Galα1-3Galβ1-4(Fuca1-3)GlcNAcB-Sp8                                                                                                                                                          | 53 | 8  |
| 557 | Galβ1-3GlcNAcβ1-6(Galβ1-3)GalNAc-Sp14                                                                                                                                                       | 53 | 5  |
| 86  | GalNAcα1-3(Fuca1-2)Galβ1-4GlcNAcB-Sp8                                                                                                                                                       | 52 | 12 |
| 224 | Neu5Acα2-3Galβ1-3GalNAcA-Sp14                                                                                                                                                               | 52 | 16 |
| 281 | Neu5Gcα2-3Galβ1-4GlcNAcB-Sp0                                                                                                                                                                | 52 | 7  |
| 92  | GalNAcα1-3GalB-Sp8                                                                                                                                                                          | 52 | 9  |
| 231 | GalNAcβ1-4(Neu5Acα2-3)Galβ1-4GlcNAcB-Sp8                                                                                                                                                    | 52 | 5  |
| 361 | Galβ1-4GlcNAcβ1-2Manα1-6(Manα1-3)Manβ1-4GlcNAcβ1-4GlcNAcB-Sp12                                                                                                                              | 52 | 6  |
| 433 | Galβ1-4GlcNAcβ1-6(Galβ1-4GlcNAcβ1-2)Manα1-6(GlcNAcβ1-4)(Galβ1-4GlcNAcβ1-2Manα1-3)Manβ1-4GlcNAcβ1-4GlcNAc-Sp21                                                                               | 52 | 9  |
| 29  | (3S)Galβ1-3GalNAcA-Sp8                                                                                                                                                                      | 52 | 13 |
| 594 | GlcNAcβ1-6(Neu5Acα2-3Galβ1-3)GalNAcA-Sp14                                                                                                                                                   | 52 | 18 |
| 19  | Galβ1-4GlcNAcβ1-6(Galβ1-4GlcNAcβ1-3)GalNAcA-Sp8                                                                                                                                             | 51 | 15 |
| 410 | GalNAcα1-3(Fuca1-2)Galβ1-4GlcNAcβ1-3GalNAcA-Sp14                                                                                                                                            | 51 | 3  |
| 592 | Neu5Acα2-6Galβ1-4GlcNAcβ1-6(Galβ1-3)GalNAcA-Sp14                                                                                                                                            | 51 | 10 |
| 114 | Galα1-3Galβ1-3GlcNAcB-Sp0                                                                                                                                                                   | 51 | 12 |
| 201 | GlcAa-Sp8                                                                                                                                                                                   | 51 | 9  |
| 341 | GlcNAcα1-4Galβ1-3GalNAc-Sp14                                                                                                                                                                | 51 | 7  |
| 363 | Neu5Acα2-6GlcNAcβ1-4GlcNAc-Sp21                                                                                                                                                             | 51 | 21 |
| 526 | Galβ1-4GlcNAcβ1-2 Manα1-6(GlcNAcβ1-4)(Galβ1-4GlcNAcβ1-2Manα1-3)Manβ1-4GlcNAcβ1-4(Fuca1-6)GlcNAc-Sp21                                                                                        | 51 | 9  |
| 569 | Galβ1-4GlcNAcβ1-3Galβ1-4GlcNAcβ1-3Galβ1-4GlcNAcβ1-3Galβ1-4GlcNAcβ1-2Manα1-6(Galβ1-4GlcNAcβ1-3Galβ1-4GlcNAcβ1-3Galβ1-4GlcNAcβ1-2Manα1-3)Manβ1-4GlcNAcβ1-4(Fuca1-6)GlcNAcB-Sp24               | 51 | 13 |
| 184 | GlcNAcβ1-3Galβ1-4GlcNAcβ1-3Galβ1-4GlcNAcB-Sp0                                                                                                                                               | 51 | 10 |
| 221 | Fuca1-2Galβ1-4(6S)GlcNAcB-Sp8                                                                                                                                                               | 51 | 21 |
| 9   | Neu5AcA-Sp8                                                                                                                                                                                 | 51 | 17 |
| 62  | Fuca1-2Galβ1-3GalNAcA-Sp14                                                                                                                                                                  | 51 | 13 |
| 508 | (3S)GalNAcβ1-4(3S)GlcNAc-Sp8                                                                                                                                                                | 51 | 7  |
| 511 | (4S)GalNAcB-Sp10                                                                                                                                                                            | 51 | 10 |
| 51  | Manα1-6(Manα1-3)Manβ1-4GlcNAcβ1-4GlcNAcB-Sp13                                                                                                                                               | 50 | 14 |
| 183 | GlcNAcβ1-3Galβ1-4GlcNAcB-Sp8                                                                                                                                                                | 50 | 10 |
| 404 | GalNAcβ1-3Galα1-6Galβ1-4GlcB-Sp8                                                                                                                                                            | 50 | 11 |
| 501 | GalNAcα1-3(Fuca1-2)Galβ1-3GlcNAcβ1-6GalNAcA-Sp14                                                                                                                                            | 50 | 9  |
| 59  | Fuca1-2Galβ1-3GalNAcβ1-3Galα1-4Galβ1-4GlcB-Sp9                                                                                                                                              | 50 | 2  |
| 137 | Neu5AcB2-6(Galβ1-3)GalNAcA-Sp8                                                                                                                                                              | 50 | 9  |
| 587 | Neu5Acα2-6Galβ1-4GlcNAcβ1-3Galβ1-4GlcNAcβ1-3GalNAcA-Sp14                                                                                                                                    | 50 | 4  |
| 472 | Neu5Acα2-6Galβ1-4GlcNAcβ1-6(Galβ1-3GlcNAcβ1-3)Galβ1-4GlcB-Sp21                                                                                                                              | 50 | 10 |
| 46  | Neu5Acα2-3(6S)Galβ1-4GlcNAcB-Sp8                                                                                                                                                            | 50 | 12 |
| 382 | Galβ1-3GlcNAcβ1-3Galβ1-4(Fuca1-3)GlcNAcβ1-6(Galβ1-3GlcNAcβ1-3)Galβ1-4Glc-Sp21                                                                                                               | 50 | 8  |
| 573 | GlcNAcβ1-3Galβ1-4GlcNAcβ1-3Galβ1-4GlcNAcβ1-6(GlcNAcβ1-3Galβ1-4GlcNAcβ1-3Galβ1-4GlcNAβ1-2)Manα1-6(GlcNAcβ1-3Galβ1-4GlcNAcβ1-3Galβ1-4GlcNAcβ1-2Manα1-3)Manβ1-4GlcNAcβ1-4(Fuca1-6)GlcNAcB-Sp24 | 49 | 9  |
| 591 | Neu5Acα2-6Galβ1-4GlcNAcβ1-3Galβ1-4GlcNAcβ1-6(Galβ1-3)GalNAcA-Sp14                                                                                                                           | 49 | 12 |
| 12  | GalB-Sp8                                                                                                                                                                                    | 49 | 8  |
| 503 | Galβ1-4GlcNAcβ1-6(Galβ1-4GlcNAcβ1-2)Manα1-6(GlcNAcβ1-4)Galβ1-4GlcNAcβ1-4(Galβ1-4GlcNAcβ1-2)Manα1-3)Manβ1-4GlcNAcβ1-4(Fuca1-6)GlcNAc-Sp21                                                    | 49 | 6  |
| 66  | Fuca1-2Galβ1-3GlcNAcβ1-3Galβ1-4GlcB-Sp10                                                                                                                                                    | 49 | 6  |
| 458 | Neu5Acα2-3Galβ1-4GlcNAcβ1-6(Neu5Acα2-3Galβ1-4GlcNAcβ1-2)Manα1-6(GlcNAcβ1-4)(Neu5Acα2-3Galβ1-4GlcNAcβ1-4(Neu5Acα2-3Galβ1-4GlcNAcβ1-2)Manα1-3)Manβ1-4GlcNAcβ1-4GlcNAcB-Sp21                   | 49 | 10 |
| 61  | Fuca1-2Galβ1-3GalNAcA-Sp8                                                                                                                                                                   | 49 | 10 |
| 372 | Neu5Acα2-3Galβ1-4GlcNAcβ1-3GalNAc-Sp14                                                                                                                                                      | 49 | 6  |
| 494 | Fuca1-2Galβ1-4GlcNAcβ1-2ManA-Sp0                                                                                                                                                            | 49 | 19 |
| 242 | Neu5Acα2-6(Neu5Acα2-3Galβ1-3)GalNAcA-Sp8                                                                                                                                                    | 48 | 12 |
| 499 | (3S)GalNAcβ1-4(Fuca1-3)GlcNAcB-Sp8                                                                                                                                                          | 48 | 4  |
| 223 | Neu5Acα2-3Galβ1-3GalNAcA-Sp8                                                                                                                                                                | 48 | 19 |



|     |                                                                                                                                                                                                                                                                                       |    |    |
|-----|---------------------------------------------------------------------------------------------------------------------------------------------------------------------------------------------------------------------------------------------------------------------------------------|----|----|
| 140 | Galβ1-3GalNAca-Sp14                                                                                                                                                                                                                                                                   | 42 | 18 |
| 574 | Galβ1-4GlcNAcβ1-3Galβ1-4GlcNAcβ1-3Galβ1-4GlcNAcβ1-6(Galβ1-4GlcNAcβ1-3Galβ1-4GlcNAcβ1-3Galβ1-4GlcNAcβ1-2)Manα1-6(Galβ1-4GlcNAcβ1-3Galβ1-4GlcNAcβ1-3Galβ1-4GlcNAcβ1-2Manα1-3)Manβ1-4GlcNAcβ1-4(Fuca1-6)GlcNAcb-Sp24                                                                     | 41 | 8  |
| 459 | Neu5Acα2-6Galβ1-4GlcNAcβ1-2Manα1-6(GlcNAcβ1-4)(Neu5Acα2-6Galβ1-4GlcNAcβ1-2Manα1-3)Manβ1-4GlcNAcβ1-4GlcNAcb-Sp21                                                                                                                                                                       | 41 | 9  |
| 492 | Fuca1-2(6S)Galβ1-3GlcNAcb-Sp0                                                                                                                                                                                                                                                         | 41 | 13 |
| 570 | GlcNAcβ1-3Galβ1-4GlcNAcβ1-3Galβ1-4GlcNAcβ1-3Galβ1-4GlcNAcβ1-3Galβ1-4GlcNAcβ1-2Manα1-6(GlcNAcβ1-3Galβ1-4GlcNAcβ1-3Galβ1-4GlcNAcβ1-3Galβ1-4GlcNAcβ1-3Galβ1-4GlcNAcβ1-2Manα1-3)Manβ1-4GlcNAcβ1-4(Fuca1-6)GlcNAcb-Sp19                                                                    | 41 | 9  |
| 49  | Neu5,9Ac2α2-6Galβ1-4GlcNAcb-Sp8                                                                                                                                                                                                                                                       | 41 | 7  |
| 135 | Neu5Acα2-6(Galβ1-3)GalNAca-Sp8                                                                                                                                                                                                                                                        | 41 | 12 |
| 595 | Neu5Acα2-6Galβ1-4GlcNAcβ1-3Galβ1-4GlcNAcβ1-6(Neu5Acα2-6Galβ1-4GlcNAcβ1-3Galβ1-4GlcNAcβ1-3)GalNAca-Sp14                                                                                                                                                                                | 41 | 8  |
| 2   | Glc-Sp8                                                                                                                                                                                                                                                                               | 41 | 22 |
| 171 | Galβ1-4Glc-Sp0                                                                                                                                                                                                                                                                        | 41 | 5  |
| 589 | Galβ1-4GlcNAcβ1-3Galβ1-3GalNAca-Sp14                                                                                                                                                                                                                                                  | 40 | 12 |
| 210 | Manα1-6(Manα1-2Manα1-3)Manα1-6(Manα1-2Manα1-3)Manβ1-4GlcNAcβ1-4GlcNAcb-Sp12                                                                                                                                                                                                           | 40 | 8  |
| 540 | Galβ1-4GlcNAcβ1-3Galβ1-4GlcNAcβ1-3Galβ1-4GlcNAcβ1-2Manα1-6(Galβ1-4GlcNAcβ1-3Galβ1-4GlcNAcβ1-3Galβ1-4GlcNAcβ1-2Manα1-3)Manβ1-4GlcNAcβ1-4GlcNAcb-Sp24                                                                                                                                   | 40 | 9  |
| 14  | Manb-Sp8                                                                                                                                                                                                                                                                              | 39 | 4  |
| 169 | Galβ1-4GlcNAcb-Sp8                                                                                                                                                                                                                                                                    | 39 | 6  |
| 232 | GalNAcβ1-4(Neu5Acα2-3)Galβ1-4Glc-Sp0                                                                                                                                                                                                                                                  | 39 | 4  |
| 85  | GalNAcα1-3(Fuca1-2)Galβ1-4GlcNAcb-Sp0                                                                                                                                                                                                                                                 | 39 | 22 |
| 139 | Galβ1-3GalNAca-Sp8                                                                                                                                                                                                                                                                    | 39 | 9  |
| 241 | Neu5Acα2-3Galβ1-3(6S)GalNAca-Sp8                                                                                                                                                                                                                                                      | 38 | 13 |
| 58  | Fuca1-2Galβ1-3GalNAcβ1-3Gala-Sp9                                                                                                                                                                                                                                                      | 38 | 11 |
| 106 | Gala1-3(Fuca1-2)Galβ1-4Glc-Sp0                                                                                                                                                                                                                                                        | 37 | 8  |
| 252 | Neu5Acα2-3Galβ1-4(Fuca1-3)GlcNAcb-Sp0                                                                                                                                                                                                                                                 | 37 | 12 |
| 437 | Neu5Acα2-3Galβ1-4GlcNAcβ1-3Galb-Sp8                                                                                                                                                                                                                                                   | 37 | 13 |
| 338 | GlcNAcα1-4Galβ1-4GlcNAcβ1-3Galβ1-4Glc-Sp0                                                                                                                                                                                                                                             | 37 | 11 |
| 38  | (3S)Galb-Sp8                                                                                                                                                                                                                                                                          | 37 | 12 |
| 505 | Galβ1-3(6S)GlcNAcb-Sp8                                                                                                                                                                                                                                                                | 37 | 9  |
| 435 | Galβ1-4Galb-Sp10                                                                                                                                                                                                                                                                      | 36 | 8  |
| 265 | Neu5Acα2-6Galβ1-4(6S)GlcNAcb-Sp8                                                                                                                                                                                                                                                      | 36 | 24 |
| 15  | GalNAcb-Sp8                                                                                                                                                                                                                                                                           | 35 | 13 |
| 497 | Neu5Acα2-6GalNAcβ1-4(6S)GlcNAcb-Sp8                                                                                                                                                                                                                                                   | 35 | 20 |
| 504 | Galβ1-3GlcNAcα1-3Galβ1-4GlcNAcb-Sp8                                                                                                                                                                                                                                                   | 35 | 11 |
| 490 | Gala1-3Galβ1-4GlcNAcβ1-6GalNAca-Sp14                                                                                                                                                                                                                                                  | 34 | 11 |
| 125 | Galβ1-2Galb-Sp8                                                                                                                                                                                                                                                                       | 34 | 12 |
| 481 | Neu5Acα2-3Galβ1-3GlcNAcβ1-2Manα1-6(GlcNAcβ1-4)(Neu5Acα2-3Galβ1-3GlcNAcβ1-2Manα1-3)Manβ1-4GlcNAcβ1-4GlcNAc-Sp21                                                                                                                                                                        | 34 | 4  |
| 544 | Neu5Gca2-8Neu5Acα2-3Galβ1-4GlcNAc-Sp0                                                                                                                                                                                                                                                 | 33 | 16 |
| 1   | Gala-Sp8                                                                                                                                                                                                                                                                              | 33 | 22 |
| 507 | (6S)GalNAcβ1-4GlcNAc-Sp8                                                                                                                                                                                                                                                              | 33 | 3  |
| 575 | GlcNAcβ1-3Galβ1-4GlcNAcβ1-3Galβ1-4GlcNAcβ1-3Galβ1-4GlcNAcβ1-6(GlcNAcβ1-3Galβ1-4GlcNAcβ1-3Galβ1-4GlcNAcβ1-3Galβ1-4GlcNAcβ1-2)Manα1-6(GlcNAcβ1-3Galβ1-4GlcNAcβ1-3Galβ1-4GlcNAcβ1-3Galβ1-4GlcNAcβ1-2Manα1-3)Manβ1-4GlcNAcβ1-4(Fuca1-6)GlcNAcb-Sp24                                       | 33 | 18 |
| 506 | (6S)(4S)GalNAcβ1-4GlcNAc-Sp8                                                                                                                                                                                                                                                          | 32 | 8  |
| 5   | GalNAca-Sp15                                                                                                                                                                                                                                                                          | 32 | 7  |
| 41  | (6P)Mana-Sp8                                                                                                                                                                                                                                                                          | 31 | 14 |
| 576 | Galβ1-4GlcNAcβ1-3Galβ1-4GlcNAcβ1-3Galβ1-4GlcNAcβ1-3Galβ1-4GlcNAcβ1-6(Galβ1-4GlcNAcβ1-3Galβ1-4GlcNAcβ1-3Galβ1-4GlcNAcβ1-3Galβ1-4GlcNAcβ1-3Galβ1-4GlcNAcβ1-2)Manα1-6(Galβ1-4GlcNAcβ1-3Galβ1-4GlcNAcβ1-3Galβ1-4GlcNAcβ1-3Galβ1-4GlcNAcβ1-2Manα1-3)Manβ1-4GlcNAcβ1-4(Fuca1-6)GlcNAcb-Sp24 | 30 | 8  |
| 564 | GlcNAcβ1-3Galβ1-4GlcNAcβ1-2Manα1-6(GlcNAcβ1-3Galβ1-4GlcNAcβ1-2Manα1-3)Manβ1-4GlcNAcβ1-4(Fuca1-6)GlcNAcb-Sp24                                                                                                                                                                          | 30 | 5  |
| 542 | Neu5Gca2-8Neu5Gca2-3Galβ1-4GlcNAc-Sp0                                                                                                                                                                                                                                                 | 29 | 5  |
| 543 | Neu5Acα2-8Neu5Gca2-3Galβ1-4GlcNAc-Sp0                                                                                                                                                                                                                                                 | 28 | 8  |
| 567 | Galβ1-4GlcNAcβ1-3Galβ1-4GlcNAcβ1-3Galβ1-4GlcNAcβ1-2Manα1-6(Galβ1-4GlcNAcβ1-3Galβ1-4GlcNAcβ1-3Galβ1-4GlcNAcβ1-2Manα1-3)Manβ1-4GlcNAcβ1-4(Fuca1-6)GlcNAcb-Sp24                                                                                                                          | 27 | 12 |

|     |                                                                                                                                                                                                                                                                                                                                                                                                                          |    |    |
|-----|--------------------------------------------------------------------------------------------------------------------------------------------------------------------------------------------------------------------------------------------------------------------------------------------------------------------------------------------------------------------------------------------------------------------------|----|----|
| 558 | Gal $\beta$ 1-4GlcNAc $\beta$ 1-3Gal $\beta$ 1-4GlcNAc $\beta$ 1-2Man $\alpha$ 1-6(Gal $\beta$ 1-4GlcNAc $\beta$ 1-3Gal $\beta$ 1-4GlcNAc $\beta$ 1-3Gal $\beta$ 1-4GlcNAc $\beta$ 1-3Gal $\beta$ 1-4GlcNAc $\beta$ 1-2Man $\alpha$ 1-3)Man $\beta$ 1-4GlcNAc $\beta$ 1-4GlcNAc-Sp25 | 27 | 7  |
| 6   | Fuca-Sp8                                                                                                                                                                                                                                                                                                                                                                                                                 | 26 | 15 |
| 546 | Neu5Gc $\alpha$ 2-8Neu5Gc $\alpha$ 2-6Gal $\beta$ 1-4GlcNAc-Sp0                                                                                                                                                                                                                                                                                                                                                          | 25 | 7  |
| 8   | Rhaa-Sp8                                                                                                                                                                                                                                                                                                                                                                                                                 | 24 | 14 |
| 348 | Man $\alpha$ 1-6(Gal $\beta$ 1-4GlcNAc $\beta$ 1-2Man $\alpha$ 1-3)Man $\beta$ 1-4GlcNAc $\beta$ 1-4GlcNAc-Sp12                                                                                                                                                                                                                                                                                                          | 18 | 30 |
| 3   | Mana-Sp8                                                                                                                                                                                                                                                                                                                                                                                                                 | 15 | 22 |
| 502 | GlcNAc $\beta$ 1-6(GlcNAc $\beta$ 1-2)Man $\alpha$ 1-6(GlcNAc $\beta$ 1-4)(GlcNAc $\beta$ 1-4)(GlcNAc $\beta$ 1-2)Man $\alpha$ 1-3)Man $\beta$ 1-4GlcNAc $\beta$ 1-4(Fuca1-6)GlcNAc-Sp21                                                                                                                                                                                                                                 | 12 | 5  |

---

**Figure S1. Sequences of C-type lectin-like domains encoded in CD23 genes in mammals.** Sequences are shown for all mammalian genes that display the conserved framework residues highlighted in *yellow*. Potential ligands for the conserved, principal Ca<sup>2+</sup> site are highlighted in *green* and potential ligands for the accessory Ca<sup>2+</sup> site are highlighted in *magenta*. Residues that do not conform to these patterns are highlighted in *gray*.

|                                                               |                     |             |                     |       |         |                 |      |      |    |        |      |     |       |      |        |      |          |      |        |        |           |
|---------------------------------------------------------------|---------------------|-------------|---------------------|-------|---------|-----------------|------|------|----|--------|------|-----|-------|------|--------|------|----------|------|--------|--------|-----------|
| <i>Homo sapiens</i> (human)                                   | YYFGKGT-KQIWHVHARYA | CDMMEGQLVSI | HSPEEODFLTKHASHTGSI | GLRNL | DLKGEFI | VWDGSHVDYSNWAPG | PTSR | SROG | DC | VMMRGS | -GRW | NAF | CDRLK | GAIV | CDRLAT | CTPP | ASEGSAES | MGDP | SRPDPD | GRPLTP | PAPSAPLHS |
| <i>Pan troglodytes</i> (chimpanzee)                           | YYFGKGT-KQIWHVHARYA | CDMMEGQLVSI | HSPEEODFLTKHASHTGSI | GLRNL | DLKGEFI | VWDGSHVDYSNWAPG | PTSR | SROG | DC | VMMRGS | -GRW | NAF | CDRLK | GAIV | CDRLAT | CTPP | ASEGSAES | MGDP | SRPDPD | GRPLTP | PAPSAPLHS |
| <i>Pan paniscus</i> (pygmy chimpanzee)                        | YYFGKGT-KQIWHVHARYA | CDMMEGQLVSI | HSPEEODFLTKHASHTGSI | GLRNL | DLKGEFI | VWDGSHVDYSNWAPG | PTSR | SROG | DC | VMMRGS | -GRW | NAF | CDRLK | GAIV | CDRLAT | CTPP | ASEGSAES | MGDP | SRPDPD | GRPLTP | PAPSAPLHS |
| <i>Nomascus leucogenys</i> (northern white-cheeked gibbon)    | YYFGKGT-KQIWHVHARYA | CDMMEGQLVSI | HSPEEODFLTKHASHTGSI | GLRNL | DLKGEFI | VWDGSHVDYSNWAPG | PTSR | SROG | DC | VMMRGS | -GRW | NAF | CDRLK | GAIV | CDRLAT | CTPP | ASEGSAES | MGDP | SRPDPD | GRPLTP | PAPSAPLHS |
| <i>Cebus capucinus imitator</i> (white-headed capuchin)       | YYFGKGT-KQIWHVHARYA | CDMMEGQLVSI | HSPEEODFLTKHASHTGSI | GLRNL | DLKGEFI | VWDGSHVDYSNWAPG | PTSR | SROG | DC | VMMRGS | -GRW | NAF | CDRLK | GAIV | CDRLAT | CTPP | ASEGSAES | MGDP | SRPDPD | GRPLTP | PAPSAPLHS |
| <i>Callithrix jacchus</i> (white-tufted-ear marmoset)         | YYFGKGT-KQIWHVHARYA | CDMMEGQLVSI | HSPEEODFLTKHASHTGSI | GLRNL | DLKGEFI | VWDGSHVDYSNWAPG | PTSR | SROG | DC | VMMRGS | -GRW | NAF | CDRLK | GAIV | CDRLAT | CTPP | ASEGSAES | MGDP | SRPDPD | GRPLTP | PAPSAPLHS |
| <i>Saimiri boliviensis</i> (Bolivian squirrel monkey)         | YYFGKGT-KQIWHVHARYA | CDMMEGQLVSI | HSPEEODFLTKHASHTGSI | GLRNL | DLKGEFI | VWDGSHVDYSNWAPG | PTSR | SROG | DC | VMMRGS | -GRW | NAF | CDRLK | GAIV | CDRLAT | CTPP | ASEGSAES | MGDP | SRPDPD | GRPLTP | PAPSAPLHS |
| <i>Gorilla gorilla</i> (western gorilla)                      | YYFGKGT-KQIWHVHARYA | CDMMEGQLVSI | HSPEEODFLTKHASHTGSI | GLRNL | DLKGEFI | VWDGSHVDYSNWAPG | PTSR | SROG | DC | VMMRGS | -GRW | NAF | CDRLK | GAIV | CDRLAT | CTPP | ASEGSAES | MGDP | SRPDPD | GRPLTP | PAPSAPLHS |
| <i>Pongo abelii</i> (Sumatran orangutan)                      | YYFGKGT-KQIWHVHARYA | CDMMEGQLVSI | HSPEEODFLTKHASHTGSI | GLRNL | DLKGEFI | VWDGSHVDYSNWAPG | PTSR | SROG | DC | VMMRGS | -GRW | NAF | CDRLK | GAIV | CDRLAT | CTPP | ASEGSAES | MGDP | SRPDPD | GRPLTP | PAPSAPLHS |
| <i>Rhinopithecus bieti</i> (black snub-nosed monkey)          | YYFGKGT-KQIWHVHARYA | CDMMEGQLVSI | HSPEEODFLTKHASHTGSI | GLRNL | DLKGEFI | VWDGSHVDYSNWAPG | PTSR | SROG | DC | VMMRGS | -GRW | NAF | CDRLK | GAIV | CDRLAT | CTPP | ASEGSAES | MGDP | SRPDPD | GRPLTP | PAPSAPLHS |
| <i>Rhinopithecus roxellana</i> (golden snub-nosed monkey)     | YYFGKGT-KQIWHVHARYA | CDMMEGQLVSI | HSPEEODFLTKHASHTGSI | GLRNL | DLKGEFI | VWDGSHVDYSNWAPG | PTSR | SROG | DC | VMMRGS | -GRW | NAF | CDRLK | GAIV | CDRLAT | CTPP | ASEGSAES | MGDP | SRPDPD | GRPLTP | PAPSAPLHS |
| <i>Ptilocolobus tephrocelestes</i> (Ugandan red Colobus)      | YYFGKGT-KQIWHVHARYA | CDMMEGQLVSI | HSPEEODFLTKHASHTGSI | GLRNL | DLKGEFI | VWDGSHVDYSNWAPG | PTSR | SROG | DC | VMMRGS | -GRW | NAF | CDRLK | GAIV | CDRLAT | CTPP | ASEGSAES | MGDP | SRPDPD | GRPLTP | PAPSAPLHS |
| <i>Colobus angolensis palliatus</i> (Angolan Colobus)         | YYFGKGT-KQIWHVHARYA | CDMMEGQLVSI | HSPEEODFLTKHASHTGSI | GLRNL | DLKGEFI | VWDGSHVDYSNWAPG | PTSR | SROG | DC | VMMRGS | -GRW | NAF | CDRLK | GAIV | CDRLAT | CTPP | ASEGSAES | MGDP | SRPDPD | GRPLTP | PAPSAPLHS |
| <i>Chlorocebus sabaeus</i> (green monkey)                     | YYFGKGT-KQIWHVHARYA | CDMMEGQLVSI | HSPEEODFLTKHASHTGSI | GLRNL | DLKGEFI | VWDGSHVDYSNWAPG | PTSR | SROG | DC | VMMRGS | -GRW | NAF | CDRLK | GAIV | CDRLAT | CTPP | ASEGSAES | MGDP | SRPDPD | GRPLTP | PAPSAPLHS |
| <i>Macaca mulatta</i> (Rhesus monkey)                         | YYFGKGT-KQIWHVHARYA | CDMMEGQLVSI | HSPEEODFLTKHASHTGSI | GLRNL | DLKGEFI | VWDGSHVDYSNWAPG | PTSR | SROG | DC | VMMRGS | -GRW | NAF | CDRLK | GAIV | CDRLAT | CTPP | ASEGSAES | MGDP | SRPDPD | GRPLTP | PAPSAPLHS |
| <i>Theropithecus gelada</i> (gelada)                          | YYFGKGT-KQIWHVHARYA | CDMMEGQLVSI | HSPEEODFLTKHASHTGSI | GLRNL | DLKGEFI | VWDGSHVDYSNWAPG | PTSR | SROG | DC | VMMRGS | -GRW | NAF | CDRLK | GAIV | CDRLAT | CTPP | ASEGSAES | MGDP | SRPDPD | GRPLTP | PAPSAPLHS |
| <i>Macaca nemestrina</i> (pig-tailed macaque)                 | YYFGKGT-KQIWHVHARYA | CDMMEGQLVSI | HSPEEODFLTKHASHTGSI | GLRNL | DLKGEFI | VWDGSHVDYSNWAPG | PTSR | SROG | DC | VMMRGS | -GRW | NAF | CDRLK | GAIV | CDRLAT | CTPP | ASEGSAES | MGDP | SRPDPD | GRPLTP | PAPSAPLHS |
| <i>Mandrillus leucophaeus</i> (drill)                         | YYFGKGT-KQIWHVHARYA | CDMMEGQLVSI | HSPEEODFLTKHASHTGSI | GLRNL | DLKGEFI | VWDGSHVDYSNWAPG | PTSR | SROG | DC | VMMRGS | -GRW | NAF | CDRLK | GAIV | CDRLAT | CTPP | ASEGSAES | MGDP | SRPDPD | GRPLTP | PAPSAPLHS |
| <i>Cercocebus atys</i> (sooty mangabey)                       | YYFGKGT-KQIWHVHARYA | CDMMEGQLVSI | HSPEEODFLTKHASHTGSI | GLRNL | DLKGEFI | VWDGSHVDYSNWAPG | PTSR | SROG | DC | VMMRGS | -GRW | NAF | CDRLK | GAIV | CDRLAT | CTPP | ASEGSAES | MGDP | SRPDPD | GRPLTP | PAPSAPLHS |
| <i>Canis toyo</i> (Philippine tarsier)                        | YYFGKGT-KQIWHVHARYA | CDMMEGQLVSI | HSPEEODFLTKHASHTGSI | GLRNL | DLKGEFI | VWDGSHVDYSNWAPG | PTSR | SROG | DC | VMMRGS | -GRW | NAF | CDRLK | GAIV | CDRLAT | CTPP | ASEGSAES | MGDP | SRPDPD | GRPLTP | PAPSAPLHS |
| <i>Propithecus coquereli</i> (Coquerel's si faka)             | YYFGKGT-KQIWHVHARYA | CDMMEGQLVSI | HSPEEODFLTKHASHTGSI | GLRNL | DLKGEFI | VWDGSHVDYSNWAPG | PTSR | SROG | DC | VMMRGS | -GRW | NAF | CDRLK | GAIV | CDRLAT | CTPP | ASEGSAES | MGDP | SRPDPD | GRPLTP | PAPSAPLHS |
| <i>Microcebus murinus</i> (grey mouse lemur)                  | YYFGKGT-KQIWHVHARYA | CDMMEGQLVSI | HSPEEODFLTKHASHTGSI | GLRNL | DLKGEFI | VWDGSHVDYSNWAPG | PTSR | SROG | DC | VMMRGS | -GRW | NAF | CDRLK | GAIV | CDRLAT | CTPP | ASEGSAES | MGDP | SRPDPD | GRPLTP | PAPSAPLHS |
| <i>Otolomur garnettii</i> (small-eared galago / bushbaby)     | YYFGKGT-KQIWHVHARYA | CDMMEGQLVSI | HSPEEODFLTKHASHTGSI | GLRNL | DLKGEFI | VWDGSHVDYSNWAPG | PTSR | SROG | DC | VMMRGS | -GRW | NAF | CDRLK | GAIV | CDRLAT | CTPP | ASEGSAES | MGDP | SRPDPD | GRPLTP | PAPSAPLHS |
| <i>Mus musculus</i> (house mouse)                             | YYFGKGT-KQIWHVHARYA | CDMMEGQLVSI | HSPEEODFLTKHASHTGSI | GLRNL | DLKGEFI | VWDGSHVDYSNWAPG | PTSR | SROG | DC | VMMRGS | -GRW | NAF | CDRLK | GAIV | CDRLAT | CTPP | ASEGSAES | MGDP | SRPDPD | GRPLTP | PAPSAPLHS |
| <i>Mus caroli</i> (Ryukyu mouse)                              | YYFGKGT-KQIWHVHARYA | CDMMEGQLVSI | HSPEEODFLTKHASHTGSI | GLRNL | DLKGEFI | VWDGSHVDYSNWAPG | PTSR | SROG | DC | VMMRGS | -GRW | NAF | CDRLK | GAIV | CDRLAT | CTPP | ASEGSAES | MGDP | SRPDPD | GRPLTP | PAPSAPLHS |
| <i>Rattus norvegicus</i> (rat)                                | YYFGKGT-KQIWHVHARYA | CDMMEGQLVSI | HSPEEODFLTKHASHTGSI | GLRNL | DLKGEFI | VWDGSHVDYSNWAPG | PTSR | SROG | DC | VMMRGS | -GRW | NAF | CDRLK | GAIV | CDRLAT | CTPP | ASEGSAES | MGDP | SRPDPD | GRPLTP | PAPSAPLHS |
| <i>Microtus ochrogaster</i> (prairie vole)                    | YYFGKGT-KQIWHVHARYA | CDMMEGQLVSI | HSPEEODFLTKHASHTGSI | GLRNL | DLKGEFI | VWDGSHVDYSNWAPG | PTSR | SROG | DC | VMMRGS | -GRW | NAF | CDRLK | GAIV | CDRLAT | CTPP | ASEGSAES | MGDP | SRPDPD | GRPLTP | PAPSAPLHS |
| <i>Peromyscus maniculatus bairdii</i> (prairie deer mouse)    | YYFGKGT-KQIWHVHARYA | CDMMEGQLVSI | HSPEEODFLTKHASHTGSI | GLRNL | DLKGEFI | VWDGSHVDYSNWAPG | PTSR | SROG | DC | VMMRGS | -GRW | NAF | CDRLK | GAIV | CDRLAT | CTPP | ASEGSAES | MGDP | SRPDPD | GRPLTP | PAPSAPLHS |
| <i>Peromyscus leucopus</i> (white-footed mouse)               | YYFGKGT-KQIWHVHARYA | CDMMEGQLVSI | HSPEEODFLTKHASHTGSI | GLRNL | DLKGEFI | VWDGSHVDYSNWAPG | PTSR | SROG | DC | VMMRGS | -GRW | NAF | CDRLK | GAIV | CDRLAT | CTPP | ASEGSAES | MGDP | SRPDPD | GRPLTP | PAPSAPLHS |
| <i>Crisetulus griseus</i> (Chinese hamster)                   | YYFGKGT-KQIWHVHARYA | CDMMEGQLVSI | HSPEEODFLTKHASHTGSI | GLRNL | DLKGEFI | VWDGSHVDYSNWAPG | PTSR | SROG | DC | VMMRGS | -GRW | NAF | CDRLK | GAIV | CDRLAT | CTPP | ASEGSAES | MGDP | SRPDPD | GRPLTP | PAPSAPLHS |
| <i>Miscivorus auratus</i> (golden hamster)                    | YYFGKGT-KQIWHVHARYA | CDMMEGQLVSI | HSPEEODFLTKHASHTGSI | GLRNL | DLKGEFI | VWDGSHVDYSNWAPG | PTSR | SROG | DC | VMMRGS | -GRW | NAF | CDRLK | GAIV | CDRLAT | CTPP | ASEGSAES | MGDP | SRPDPD | GRPLTP | PAPSAPLHS |
| <i>Heterocephalus glaber</i> (naked mole-rat)                 | YYFGKGT-KQIWHVHARYA | CDMMEGQLVSI | HSPEEODFLTKHASHTGSI | GLRNL | DLKGEFI | VWDGSHVDYSNWAPG | PTSR | SROG | DC | VMMRGS | -GRW | NAF | CDRLK | GAIV | CDRLAT | CTPP | ASEGSAES | MGDP | SRPDPD | GRPLTP | PAPSAPLHS |
| <i>Fukomys damarensis</i> (Damara mole-rat)                   | YYFGKGT-KQIWHVHARYA | CDMMEGQLVSI | HSPEEODFLTKHASHTGSI | GLRNL | DLKGEFI | VWDGSHVDYSNWAPG | PTSR | SROG | DC | VMMRGS | -GRW | NAF | CDRLK | GAIV | CDRLAT | CTPP | ASEGSAES | MGDP | SRPDPD | GRPLTP | PAPSAPLHS |
| <i>Marmota marmota marmota</i> (Alpine marmot)                | YYFGKGT-KQIWHVHARYA | CDMMEGQLVSI | HSPEEODFLTKHASHTGSI | GLRNL | DLKGEFI | VWDGSHVDYSNWAPG | PTSR | SROG | DC | VMMRGS | -GRW | NAF | CDRLK | GAIV | CDRLAT | CTPP | ASEGSAES | MGDP | SRPDPD | GRPLTP | PAPSAPLHS |
| <i>Marmota flaviventris</i> (Yellow-bellied marmot)           | YYFGKGT-KQIWHVHARYA | CDMMEGQLVSI | HSPEEODFLTKHASHTGSI | GLRNL | DLKGEFI | VWDGSHVDYSNWAPG | PTSR | SROG | DC | VMMRGS | -GRW | NAF | CDRLK | GAIV | CDRLAT | CTPP | ASEGSAES | MGDP | SRPDPD | GRPLTP | PAPSAPLHS |
| <i>Ictodromus tridecemlineatus</i> (13-lined ground squirrel) | YYFGKGT-KQIWHVHARYA | CDMMEGQLVSI | HSPEEODFLTKHASHTGSI | GLRNL | DLKGEFI | VWDGSHVDYSNWAPG | PTSR | SROG | DC | VMMRGS | -GRW | NAF | CDRLK | GAIV | CDRLAT | CTPP | ASEGSAES | MGDP | SRPDPD | GRPLTP | PAPSAPLHS |
| <i>Urociellus parryi</i> (Arctic ground squirrel)             | YYFGKGT-KQIWHVHARYA | CDMMEGQLVSI | HSPEEODFLTKHASHTGSI | GLRNL | DLKGEFI | VWDGSHVDYSNWAPG | PTSR | SROG | DC | VMMRGS | -GRW | NAF | CDRLK | GAIV | CDRLAT | CTPP | ASEGSAES | MGDP | SRPDPD | GRPLTP | PAPSAPLHS |
| <i>Nannospalax galii</i> (upper Galilee mtn blind mole rat)   | YYFGKGT-KQIWHVHARYA | CDMMEGQLVSI | HSPEEODFLTKHASHTGSI | GLRNL | DLKGEFI | VWDGSHVDYSNWAPG | PTSR | SROG | DC | VMMRGS | -GRW | NAF | CDRLK | GAIV | CDRLAT | CTPP | ASEGSAES | MGDP | SRPDPD | GRPLTP | PAPSAPLHS |
| <i>Cavia porcellus</i> (domestic guinea pig)                  | YYFGKGT-KQIWHVHARYA | CDMMEGQLVSI | HSPEEODFLTKHASHTGSI | GLRNL | DLKGEFI | VWDGSHVDYSNWAPG | PTSR | SROG | DC | VMMRGS | -GRW | NAF | CDRLK | GAIV | CDRLAT | CTPP | ASEGSAES | MGDP | SRPDPD | GRPLTP | PAPSAPLHS |
| <i>Chinchilla lanigera</i> (long-tailed chinchilla)           | YYFGKGT-KQIWHVHARYA | CDMMEGQLVSI | HSPEEODFLTKHASHTGSI | GLRNL | DLKGEFI | VWDGSHVDYSNWAPG | PTSR | SROG | DC | VMMRGS | -GRW | NAF | CDRLK | GAIV | CDRLAT | CTPP | ASEGSAES | MGDP | SRPDPD | GRPLTP | PAPSAPLHS |
| <i>Octodon degus</i> (degu)                                   | YYFGKGT-KQIWHVHARYA | CDMMEGQLVSI | HSPEEODFLTKHASHTGSI | GLRNL | DLKGEFI | VWDGSHVDYSNWAPG | PTSR | SROG | DC | VMMRGS | -GRW | NAF | CDRLK | GAIV | CDRLAT | CTPP | ASEGSAES | MGDP | SRPDPD | GRPLTP | PAPSAPLHS |
| <i>Castor canadensis</i> (American beaver)                    | YYFGKGT-KQIWHVHARYA | CDMMEGQLVSI | HSPEEODFLTKHASHTGSI | GLRNL | DLKGEFI | VWDGSHVDYSNWAPG | PTSR | SROG | DC | VMMRGS | -GRW | NAF | CDRLK | GAIV | CDRLAT | CTPP | ASEGSAES | MGDP | SRPDPD | GRPLTP | PAPSAPLHS |
| <i>Dipodomys ordii</i> (Ord's kangaroo rat)                   | YYFGKGT-KQIWHVHARYA | CDMMEGQLVSI | HSPEEODFLTKHASHTGSI | GLRNL | DLKGEFI | VWDGSHVDYSNWAPG | PTSR | SROG | DC | VMMRGS | -GRW | NAF | CDRLK | GAIV | CDRLAT | CTPP | ASEGSAES | MGDP | SRPDPD | GRPLTP | PAPSAPLHS |
| <i>Bos taurus</i> (cow)                                       | YYFGKGT-KQIWHVHARYA | CDMMEGQLVSI | HSPEEODFLTKHASHTGSI | GLRNL | DLKGEFI | VWDGSHVDYSNWAPG | PTSR | SROG | DC | VMMRGS | -GRW | NAF | CDRLK | GAIV | CDRLAT | CTPP | ASEGSAES | MGDP | SRPDPD | GRPLTP | PAPSAPLHS |
| <i>Bos indicus</i> (zebu)                                     | YYFGKGT-KQIWHVHARYA | CDMMEGQLVSI | HSPEEODFLTKHASHTGSI | GLRNL | DLKGEFI | VWDGSHVDYSNWAPG | PTSR | SROG | DC | VMMRGS | -GRW | NAF | CDRLK | GAIV | CDRLAT | CTPP | ASEGSAES | MGDP | SRPDPD | GRPLTP | PAPSAPLHS |
| <i>Bos indicus x Bos taurus</i> (hybrid cattle)               | YYFGKGT-KQIWHVHARYA | CDMMEGQLVSI | HSPEEODFLTKHASHTGSI | GLRNL | DLKGEFI | VWDGSHVDYSNWAPG | PTSR | SROG | DC | VMMRGS | -GRW | NAF | CDRLK | GAIV | CDRLAT | CTPP | ASEGSAES | MGDP | SRPDPD | GRPLTP | PAPSAPLHS |
| <i>Bos mutus</i> (wild yak)                                   | YYFGKGT-KQIWHVHARYA | CDMMEGQLVSI | HSPEEODFLTKHASHTGSI | GLRNL | DLKGEFI | VWDGSHVDYSNWAPG | PTSR | SROG | DC | VMMRGS | -GRW | NAF | CDRLK | GAIV | CDRLAT | CTPP | ASEGSAES | MGDP | SRPDPD | GRPLTP | PAPSAPLHS |
| <i>Ovis aries</i> (sheep)                                     | YYFGKGT-KQIWHVHARYA | CDMMEGQLVSI | HSPEEODFLTKHASHTGSI | GLRNL | DLKGEFI | VWDGSHVDYSNWAPG | PTSR | SROG | DC | VMMRGS | -GRW | NAF | CDRLK | GAIV | CDRLAT | CTPP | ASEGSAES | MGDP | SRPDPD | GRPLTP | PAPSAPLHS |
| <i>Capra hircus</i> (goat)                                    | YYFGKGT-KQIWHVHARYA | CDMMEGQLVSI | HSPEEODFLTKHASHTGSI | GLRNL | DLKGEFI | VWDGSHVDYSNWAPG | PTSR | SROG | DC | VMMRGS | -GRW | NAF | CDRLK | GAIV | CDRLAT | CTPP | ASEGSAES | MGDP | SRPDPD | GRPLTP | PAPSAPLHS |
| <i>Bubalus bubalis</i> (water buffalo)                        | YYFGKGT-KQIWHVHARYA | CDMMEGQLVSI | HSPEEODFLTKHASHTGSI | GLRNL | DLKGEFI | VWDGSHVDYSNWAPG | PTSR | SROG | DC | VMMRGS | -GRW | NAF | CDRLK | GAIV | CDRLAT | CTPP | ASEGSAES | MGDP | SRPDPD | GRPLTP | PAPSAPLHS |
| <i>Pantholops hodgsonii</i> (chiru / Tibetan antelope)        | YYFGKGT-KQIWHVHARYA | CDMMEGQLVSI | HSPEEODFLTKHASHTGSI | GLRNL | DLKGEFI | VWDGSHVDYSNWAPG | PTSR | SROG | DC | VMMRGS | -GRW | NAF | CDRLK | GAIV | CDRLAT | CTPP | ASEGSAES | MGDP | SRPDPD | GRPLTP | PAPSAPLHS |
| <i>Balaenoptera acutorostrata scammoni</i> (Minke whale)      | YYFGKGT-KQIWHVHARYA | CDMME       |                     |       |         |                 |      |      |    |        |      |     |       |      |        |      |          |      |        |        |           |

*Hipposideros armiger* (great round leaf bat) YFFGEGA-KRWI QARLACSKLQGRRLVSI HSQEEQDFLVKHI NRKESWI GLRDLNI EGNFVWMDENPVNYSNWRPG PANGGEGDCVMMMLSS-GOWNDAFCNSLLNGWVCERLATC  
*Phyllostomus discolor* (pale spear-nosed bat) YFFGEGA-KRWI QARFACSKLHGRLVSI HNOEEQDFLAKYVNNKGSWI GLRDLDI GEFVWMDGSPLEYSNWRPG PANGGEGDCVMMMLGL-GOWNDAFCNSYLEGWMCDRLATC  
*Equus caballus* (horse) YFFGEGP-KRWI QARFACSKLHGRLVSI HSQEEQDFLTRHANKKGSWI GLRDLNI GEFVWMDQNP LDYSNWPQGP PANGGEGDCVMMRAS-GHWNDAFCGSYLDGWVCDRLVTC  
*Equus asinus* (ass) YFFGEGP-KRWI QARFACSKLHGRLVSI HSQEEQDFLTRHANKKGSWI GLRDLNI GEFVWMDQNP LDYSNWPQGP PANGGEGDCVMMRAS-GHWNDAFCGSYLDGWVCDRLVTC  
*Ceratotherium simum simum* (southern white rhinoceros) YFFGEGP-KKWI EARFACSKLQGRRLVSI HSQEEQDFLTRANKKGSWI GLRDLNI GEFVWMDENPLDYSNWPQGP PANGGEGDCVMMQGS-GHWNDAFCLSRLDGSWVCDRLATC  
*Condylura cristata* (star-nosed mole) YFFGQGS-KKWVQARNACRGLQGQLVSI HSQEEQDFLTRHVSRTGSWI GLRDLDI GEFVWMDGNPLDYSNWPQGP PANGGEGDCVMMQGS-GOWNDAFCYSPLDSWVCDRLATC  
*Sorex araneus* (European shrew) YFFGQGS-KKWVQARNACRGLQGQLVSI HSQEEQDFLTRHVSRTGSWI GLRDLDI GEFVWMDGNPLDYSNWPQGP PANGGEGDCVMMQGS-GOWNDAFCYSPLDSWVCDRLATC  
*Erinaceus europaeus* (western European hedgehog) YFFGQGS-KKWI QARQACRQLQGQLVSI HSQAEQDFLTRASRTGSWI GLRDLDI GDFI WMDQPLNYSNWRPG PANGGEGDCVMMQGS-GOWNDAFCRSLLDGSWVCDRLATC  
*Oryctolagus cuniculus* (rabbit) YFFGEGS-KQWI HARYACDNLQGRRLVSI HSQEEQDFLAKHVSKRGSWI GLRDLDI GEFV WVDGSRMYSNWRPG PANGGEGDCVMMQGS-GLWNDAFCRSLLDAWVCDRLATCGPRRA  
*Tupaia chinensis* (Chinese tree shrew) YFFGKGA-KKWI QARYACEDLGGRLVSI HSREEQDFLTRANKKGSWI GLRDLDI GEFV WMDGSPVGYSNWPQGP PANGGEGDCVLMKES-GEWNDAFCRDYLDTWVCDRLASCEPPTTLQDGF  
*Dasyurus novemcinctus* (nine-banded armadillo) YFFGEGA-KTWI QAKYACSDLQGRRLVSI HSQEEQDFLTRHSHKGSWI GLRDLDI GEFV WMDGSPVGYSNWRPG PANGGEGDCVIMLGS-GOWNDAFCRSEQSGWVCDRLATC  
*Orycteropus afer afer* (aardvark) YFFGEGA-KMVI QAKYACNDLHAQLVSI HSPEEQDFLSTRHAKKD-SWTGLDLDI GEFV WLDGSPVGYSNWRPG PANGGEGDCVIMLGS-GOWNDAFCRSEQSGWVCDRLATC  
*Loxodonta africana* (African savanna elephant) YFFGDSA-QMWLQAKYACEDLHGRLVSI HSSEEQDFLRRHI HRKDSWI GLDLDI GEFV WSDGSPMYSNWRPG PANGGEGDCVIMLGS-GOWNDAFCRSEQSGWVCDRLATC  
*Trichechus manatus latirostris* (Florida manatee) YFFGEGS-RMWLQAKYACEDLHGRLVSI HSSEEQDFLRRHAKKD-SWI GLDLDI GEFV WSDGSPVGYSNWRPG PANGGEGDCVIMLGS-GOWNDAFCRSEQSGWVCDRLATC  
*Elephantulus edwardii* (cape elephant shrew) YFFGEGA-QTWLQAKYACEDLHGRLVSI HSSEEQDFLSSSHANKEGSWTGLDLDI GEFV WLDGSPVGYSNWRPG PANGGEGDCVIMLGS-GOWNDAFCRSEQSGWVCDRLATC  
*Echinosorex taliaii* (small Madagascar hedgehog) YFFGRSKPRKWI QAKHACSDLQGRRLVSI HSQEEQDFLSTRHAKKGSWI GLDLDI GEFV WMDGSPVGYSNWRPG PANGGEGDCVIMLGS-GOWNDAFCRSEQSGWVCDRLATC  
*Chrysochloris asiatica* (cape golden mole) YFFGKDS-WTWLQAKHACSELGRRLVSI HSSEEQDFLRRCI KEKDSWTGLDLDI GEFV WLDGSPMYSNWRPG PANGGEGDCVIMLGS-GOWNDAFCRSEQSGWVCDRLATC  
*Galeopterus variegatus* (Sunda flying lemur) YFFGKEG-KRWLHAQYACSDI EGRRLVSI HSPEEQDFLTRHANKKGSWI GLDLDI GEFV WMDGSAVDYSNWRPG PANGGEGDCVMMQGS-GOWNDAFCRSELGAWVCDRLATCGPPATASASAGPPGPPAHPLHVPPAP  
*Monodelphis domestica* (gray short-tailed opossum) YFFGKEP-KTWSQAKFACI NLQGRRLVSI KSREEQDFLTRANKKGSWI GLRDLDI GEFV WMDGSPVGYSNWRPG PANGGEGDCVAMRGTSLWNDAFCRGOODSWI CEKLATC  
*Phascolarctos cinereus* (koala) YFFGKEP-KTWSQAKFACI NLQGRRLVSI KSREEQDFLTRANKKGSWI GLRDLDI GEFV WMDGSPVGYSNWRPG PANGGEGDCVAMRGTSLWNDAFCRGOODSWI CEKLATC  
*Vombatus ursinus* (common wombat) YFFGKEP-KTWSQAKFACI NLQGRRLVSI KSREEQDFLTRANKKGSWI GLRDLDI GEFV WMDGSPVGYSNWRPG PANGGEGDCVAMRGTSLWNDAFCRGOODSWI CEKLATC  
*Sarcophilus harrisi* (Tasmanian devil) YFFGKEP-KTWSQAKFACI NLQGRRLVSI KSREEQDFLTRANKKGSWI GLRDLDI GEFV WMDGSPVGYSNWRPG PANGGEGDCVAMRGTSLWNDAFCRGOODSWI CEKLATC



**Figure S2.** PCR primers for cow CD23 cDNA. PCR primers are indicated in blue. Upper panel shows primers for amplification from spleen cDNA library. Lower panel shows primers for re-amplification from first PCR product. The *red* sequence shows the linker sequence used to insert the fragment into the pT5T expression vector. The *green* sequence shows the biotinylation tag appended to the C-terminus.

I GI yLysLeuTrpI I eGI uLeuArgAl aAl aAsnGI ySerVal CysAsn  
 gggaaagtgtggatcgagctacgcgtgccaacggctctgtgtgcaac  
 5' -*gggaaagttgtggatcgagctacg*-3'

ThrCysProGI uAl aTrpI I eTyrPheGI nLysLysCysTyrTyrPheGI yGI uGI yAl a  
 acgtgccccgagcatggatctatttccaaaagaagtgctactacttcggggagggcgcc

LysLysTrpI I eGI nAl aArgTyrAl aCysGI uAsnLeuHi sGI yArgLeuVal SerI I e  
 aagaaatggatccaggccccggtagcctgtgaaaaatctgcacgggaggctggtagcatc

Hi sSerProGI uGI uGI nAspPheLeuThrLysArgAl aAsnTrpArgGI ySerTrpI I e  
 cacagcccagaggagcaggacttcttgaccaaacgtgccaactggaggggctcctggatt

GI yLeuArgAspLeuAspI I eGI uGI yGI uPheI I eTrpMetAspAsnGI nProLeuAsp  
 ggccttcgggacctggacattgaaggggagtttatctggatggacaaccagcccctggac

TyrSerAsnTrpGI nProGI yGI uProAsnAspAl aGI yGI nGI yGI uAsnCysVal Met  
 tatagcaactggcagccaggggagcccaacgatgcaggccagggtgagaactgcgtgatg

MetLeuGI ySerGI yLysTrpAsnAspAl aPheCysGI ySerGI uLeuHi sGI yTrpVal  
 atgctgggctctgggaagtggaaatgacgccttctgtggaagcgaacttcatggctgggtg

CysAspArgLeuAl aThrCys\*\*\*  
 tgcgaccggctggccacgtgctgagcgttggcctgccacctggcc  
 3' -*ctcgcaaccggacgggtggaaccgg*-5'

*Met*Al aAsnGI ySerVal CysAsn  
 ggatccgatcttggaggatgattaaatggccaacggctctgtgtgcaac  
 5' -*ggatccgatcttggaggatgattaaatggccaacggctctgtgtgcaac*

ThrCysProGI uAl aTrpI I eTyrPheGI nLysLysCysTyrTyrPheGI yGI uGI yAl a  
 acgtgccccgagcatggatctatttccaaaagaagtgctactacttcggggagggcgcc  
*acgtgc*-3'

LysLysTrpI I eGI nAl aArgTyrAl aCysGI uAsnLeuHi sGI yArgLeuVal SerI I e  
 aagaaatggatccaggccccggtagcctgtgaaaaatctgcacgggaggctggtagcatc

Hi sSerProGI uGI uGI nAspPheLeuThrLysArgAl aAsnTrpArgGI ySerTrpI I e  
 cacagcccagaggagcaggacttcttgaccaaacgtgccaactggaggggctcctggatt

GI yLeuArgAspLeuAspI I eGI uGI yGI uPheI I eTrpMetAspAsnGI nProLeuAsp  
 ggccttcgggacctggacattgaaggggagtttatctggatggacaaccagcccctggac

TyrSerAsnTrpGI nProGI yGI uProAsnAspAl aGI yGI nGI yGI uAsnCysVal Met  
 tatagcaactggcagccaggggagcccaacgatgcaggccagggtgagaactgcgtgatg

MetLeuGI ySerGI yLysTrpAsnAspAl aPheCysGI ySerGI uLeuHi sGI yTrpVal  
 atgctgggctctgggaagtggaaatgacgccttctgtggaagcgaacttcatggctgggtg  
 3' -*cac*

CysAspArgLeuAl aThrCysGI yLeuAsnAspI I ePheGI uAl aGI nLysI I eGI uTrp  
 tgcgaccggctggccacgtgctggcctgaatgacatcttcaagcacagaaaatcgagtg  
*acgctggccgaccgggtgcacgccggacttactgtagaagcttctgtcttttagctcacc*

Hi sGI u\*\*\*  
 catgagtaggaattc  
 gtactcatccttaag-5'

**Figure S3.** PCR primers for mouse CD23 cDNA. PCR primers are indicated in blue. The red sequence shows the linker sequence used to insert the fragment into the pT5T expression vector. The green sequence shows the biotinylation tag appended to the C-terminus.

\*\*\*MetAl a

ggatccgatcttggaggatgattaaatggcc

5' -ggatccgatcttggaggatgattaaatggcc

ThrAl aCysAsnI l eCysProLysAsnTrpLeuHi sPheGl nGl nLysCysTyrTyrPhe  
 actgcatgcaacatatgtccaagaactggctccatttccaacagaagtgctactatfff  
 actgcatgcaacatatgtccaag

Gl yLysGl ySerLysGl nTrpI l eGl nAl aArgPheAl aCysSerAspLeuGl nGl yArg  
 ggcaagggctccaagcagtggatccaggccaggttcgcctgcagtgcctgcaagggcga

LeuVal SerI l eHi sSerGl nLysGl uGl nAspPheLeuMetGl nHi sI l eAsnLysLys  
 ctagtccagcatccacagccaaaaggaacaggacttcctgatgcaacacatcaacaagaag

AspSerTrpI l eGl yLeuGl nAspLeuAsnMetGl uGl yGl uPheVal TrpSerAspGl y  
 gattcctggattggcctccaggatctcaatatggagggagagtttgtaggtcggacggg

SerProVal Gl yTyrSerAsnTrpAsnProGl yGl uProAsnAsnGl yGl yGl nGl yGl u  
 agccctgtgggttatagcaactggaatccaggggagcccaataacggggggccagggtgag

AspCysVal MetMetArgGl ySerGl yGl nTrpAsnAspAl aPheCysArgSerTyrLeu  
 gactgtgtgatgatgcggggatccggccagtggaacgacgccttctgccgcagctacttg

AspAl aTrpVal CysGl uGl nLeuAl aThrCysGl uI l eLeuAsnAspI l ePheGl uAl a  
 gatgcatgggtgtgtgagcagctggcaacatgtgagatactgaatgacatcttcaagca  
 3' -gacttactgtagaagcttcgt

Gl nLysI l eGl uTrpHi sGl u\*\*\*  
 cagaaaatcgagtggcatgagtaggaattc  
 gtcttttagctcaccgtactcatccttaag-5'

**Figure S4.** Sequence of codon-optimized cDNA for the CRD from cow CD23 without biotin tag. Bases highlighted in red were changed from the cow genome sequence to insert and remove restriction sites to allow cloning into the pT5T expression vector.

MetAl aAsnGI ySerVal CysAsn  
aatggccaacggctctgtgtgcaac

ThrCysProGI uAl aTrpI l eTyrPheGI nLysLysCysTyrTyrPheGI yGI uGI yAl a  
acgtgccccgagcatggatctatttccaaaagaagtgctactacttcggggagggcgcc

LysLysTrpI l eGI nAl aArgTyrAl aCysGI uAsnLeuHi sGI yArgLeuVal SerI l e  
aagaaatggatccaggcccggtacgcctgtgaaaaatctgcacgggcggctggttagcatc

Hi sSerProGI uGI uGI nAspPheLeuThrLysArgAl aAsnTrpArgGI ySerTrpI l e  
cacagcccagaggagcaggacttcctgaccaaacgtgccaactggaggggctcctggatt

GI yLeuArgAspLeuAspI l eGI uGI yGI uPheI l eTrpMetAspAsnGI nProLeuAsp  
ggccttcgggacctggacattgaaggggagtttatctggatggacaaccagcccctggac

TyrSerAsnTrpGI nProGI yGI uProAsnAspAl aGI yGI nGI yGI uAsnCysVal Met  
tatagcaactggcagccaggggagccaacgatgcaggccaggtgagaactgcgtgatg

MetLeuGI ySerGI yLysTrpAsnAspAl aPheCysGI ySerGI uLeuHi sGI yTrpVal  
atgctgggctctgggaagtggaatgacgccttctgtggaagcgaacttcatggctgggtg

CysAspArgLeuAl aThrCys\*\*\*  
tgcgaccggctggcaacgtgctagaattc
